# Supplementary material for: Carotenoid Composition of Telekia speciosa
Source: MDPI journal article supplement (doi:10.3390/plants12244116), 2023-12-08

# Supplementary materials

## Carotenoid composition of *Telekia speciosa*

Erzsébet Varga 1, Viktória Lilla Balázs 2, Viktor Sándor 3, Attila Agócs 4, Veronika Nagy 4, Sándor Balázs Király 5, Tibor Kurtán 5, Péter Molnár 2 and József Deli 2,4,\*

<sup>1</sup> Department of Pharmacognosy and Phytotherapy, George Emil Palade University of Medicine, Pharmacy, Science and Technology of Targu Mures, 540139 Târgu Mureș, Romania

<sup>2</sup> Department of Pharmacognosy, Faculty of Pharmacy, University of Pécs, Rókus utca 2, H-7624 Pécs, Hungary

<sup>3</sup> Institute of Bioanalysis, Medical School, University of Pécs, Szigeti út 12, H-7624 Pécs, Hungary

<sup>4</sup> Department of Biochemistry and Medical Chemistry, Medical School, University of Pécs, Szigeti út 12, H-7624 Pécs, Hungary

<sup>5</sup> Department of Organic Chemistry, Faculty of Sciences, University of Debrecen, H-4032 Debrecen, Hungary

\* Correspondence: jozsef.deli@aok.pte.hu

---

**Figure S1.** Structure of carotenoids

---

**Figure S2-5.** <sup>1</sup>H-, <sup>13</sup>C-, <sup>1</sup>H,<sup>1</sup>H-COSY, and <sup>1</sup>H,<sup>13</sup>C-HMQC NMR spectra of β-carotene 5,6-epoxide (**10**)

---

**Figure S6-9.** <sup>1</sup>H-, <sup>13</sup>C-, <sup>1</sup>H,<sup>1</sup>H-COSY, and <sup>1</sup>H,<sup>13</sup>C-HMQC NMR spectra of β-carotene 5,6,5',6'-diepoxide (**11**)

---

**Figure S10.** UV-vis and EIC chromatogram of *Teleki speciosa* flower extract

---

**Figure S11.** UV-vis spectra of carotenoids in *Teleki speciosa* flower extract detected by HPLC-DAD

---

**Figure S1.** Structure of carotenoids

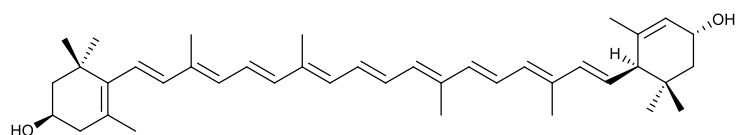

Lutein (1)

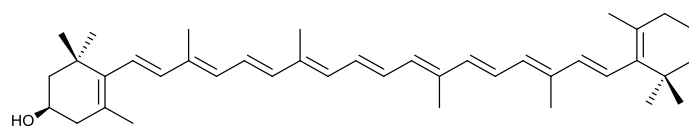

$\beta$ -Cryptoxanthin (2)

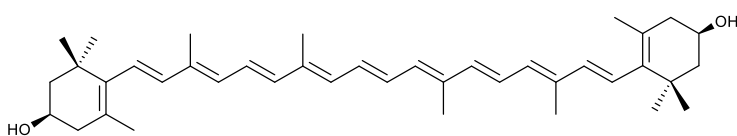

Zeaxanthin (3)

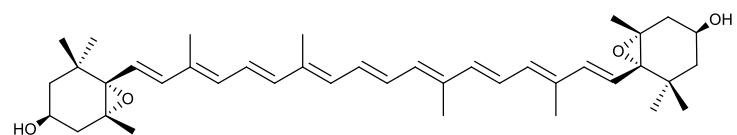

Violaxanthin (4)

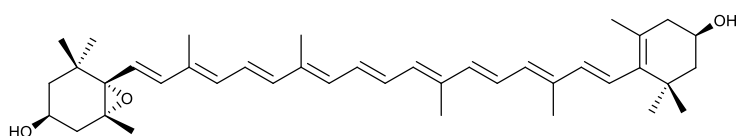

Antheraxanthin (5)

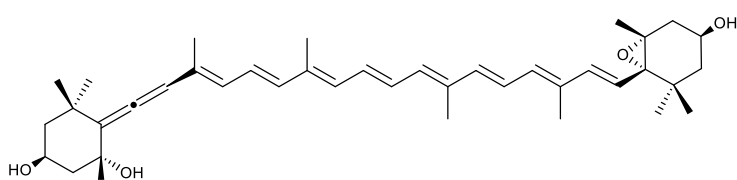

(all-*E*)-Neoxanthin (6)

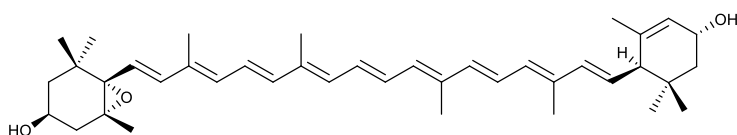

Lutein 5,6-epoxide (7)

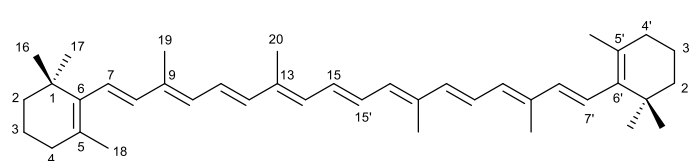

$\beta$ -Carotene (8)

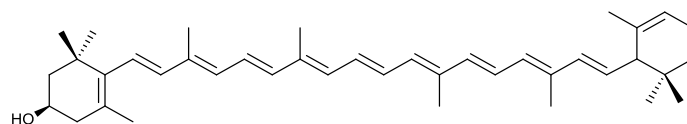

$\alpha$ -Cryptoxanthin (9)

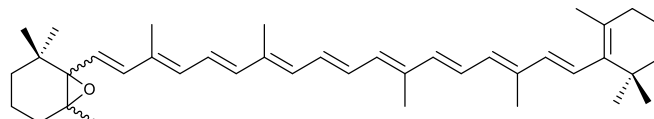

$\beta$ -Carotene 5,6-epoxide (10)

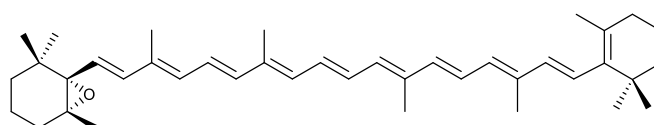

(5R,6S)- $\beta$ -Carotene 5,6-epoxide (10a)

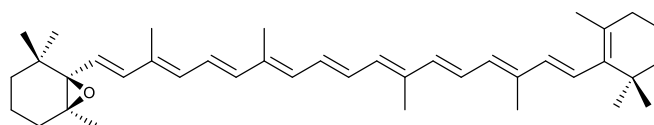

(5S,6R)- $\beta$ -Carotene 5,6-epoxide (10b)

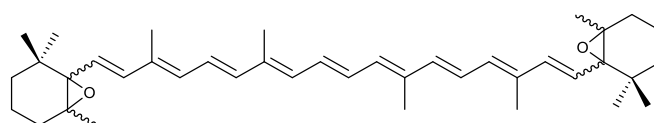

$\beta$ -Carotene 5,6,5',6'-diepoxide (11)

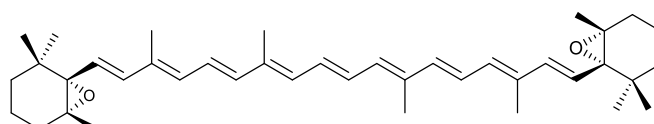

(5R,6S,5'R,6'S)- $\beta$ -Carotene 5,6,5',6'-diepoxide (11a)

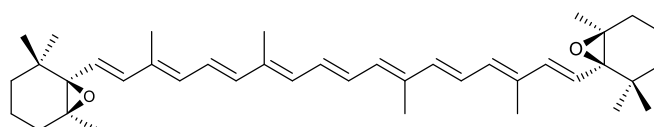

(5S,6R,5'S,6'R)- $\beta$ -Carotene 5,6,5',6'-diepoxide (11b)

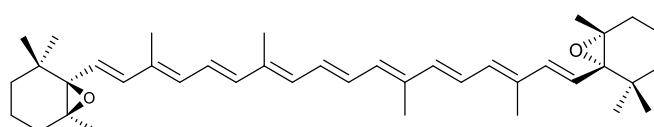

(5S,6R,5'R,6'S)- $\beta$ -Carotene-5,6,5',6'-diepoxide (11c)

**Figure S2.a.**  $^1\text{H}$ -NMR spectrum of  $\beta$ -carotene 5,6-epoxide (**10**) in  $\text{CDCl}_3$  (400 MHz)

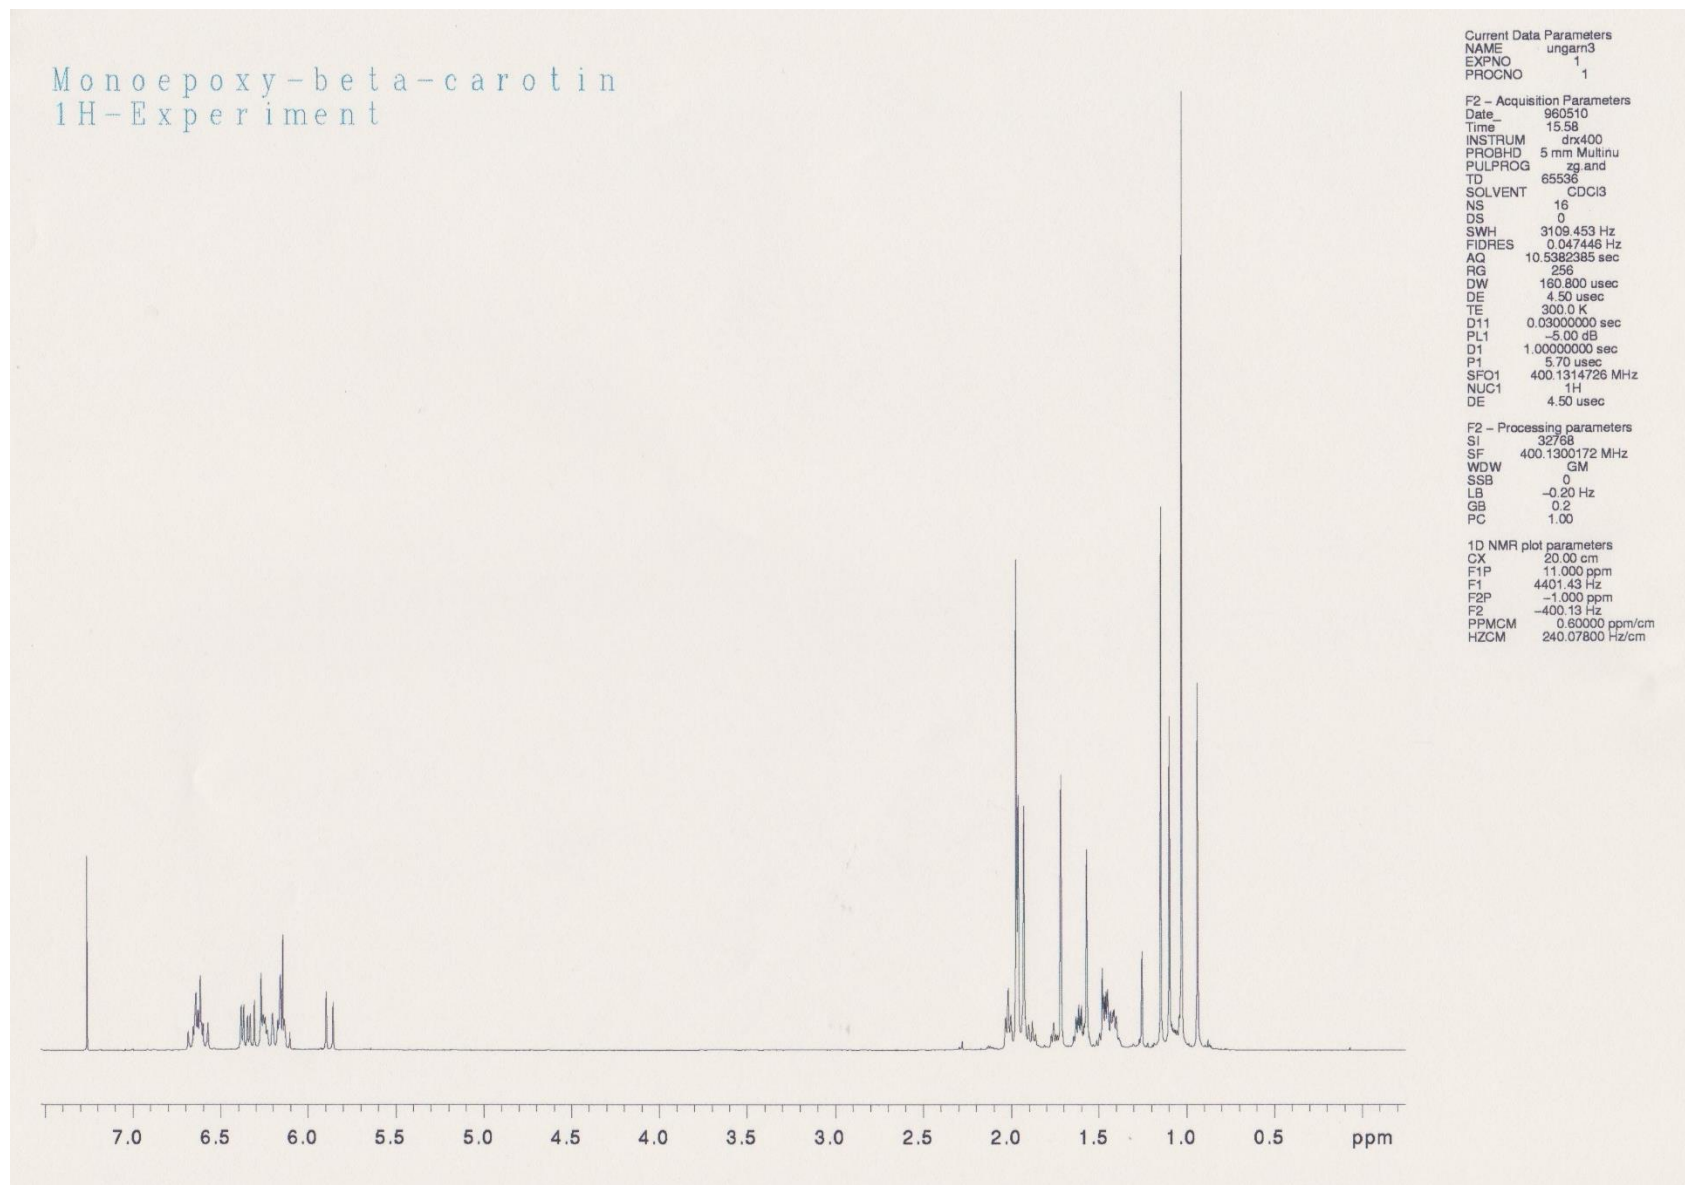

**Figure S2.b.**  $^1\text{H}$ -NMR spectrum of  $\beta$ -carotene 5,6-epoxide (**10**) in  $\text{CDCl}_3$  (400 MHz) (5.8-6.7 ppm)

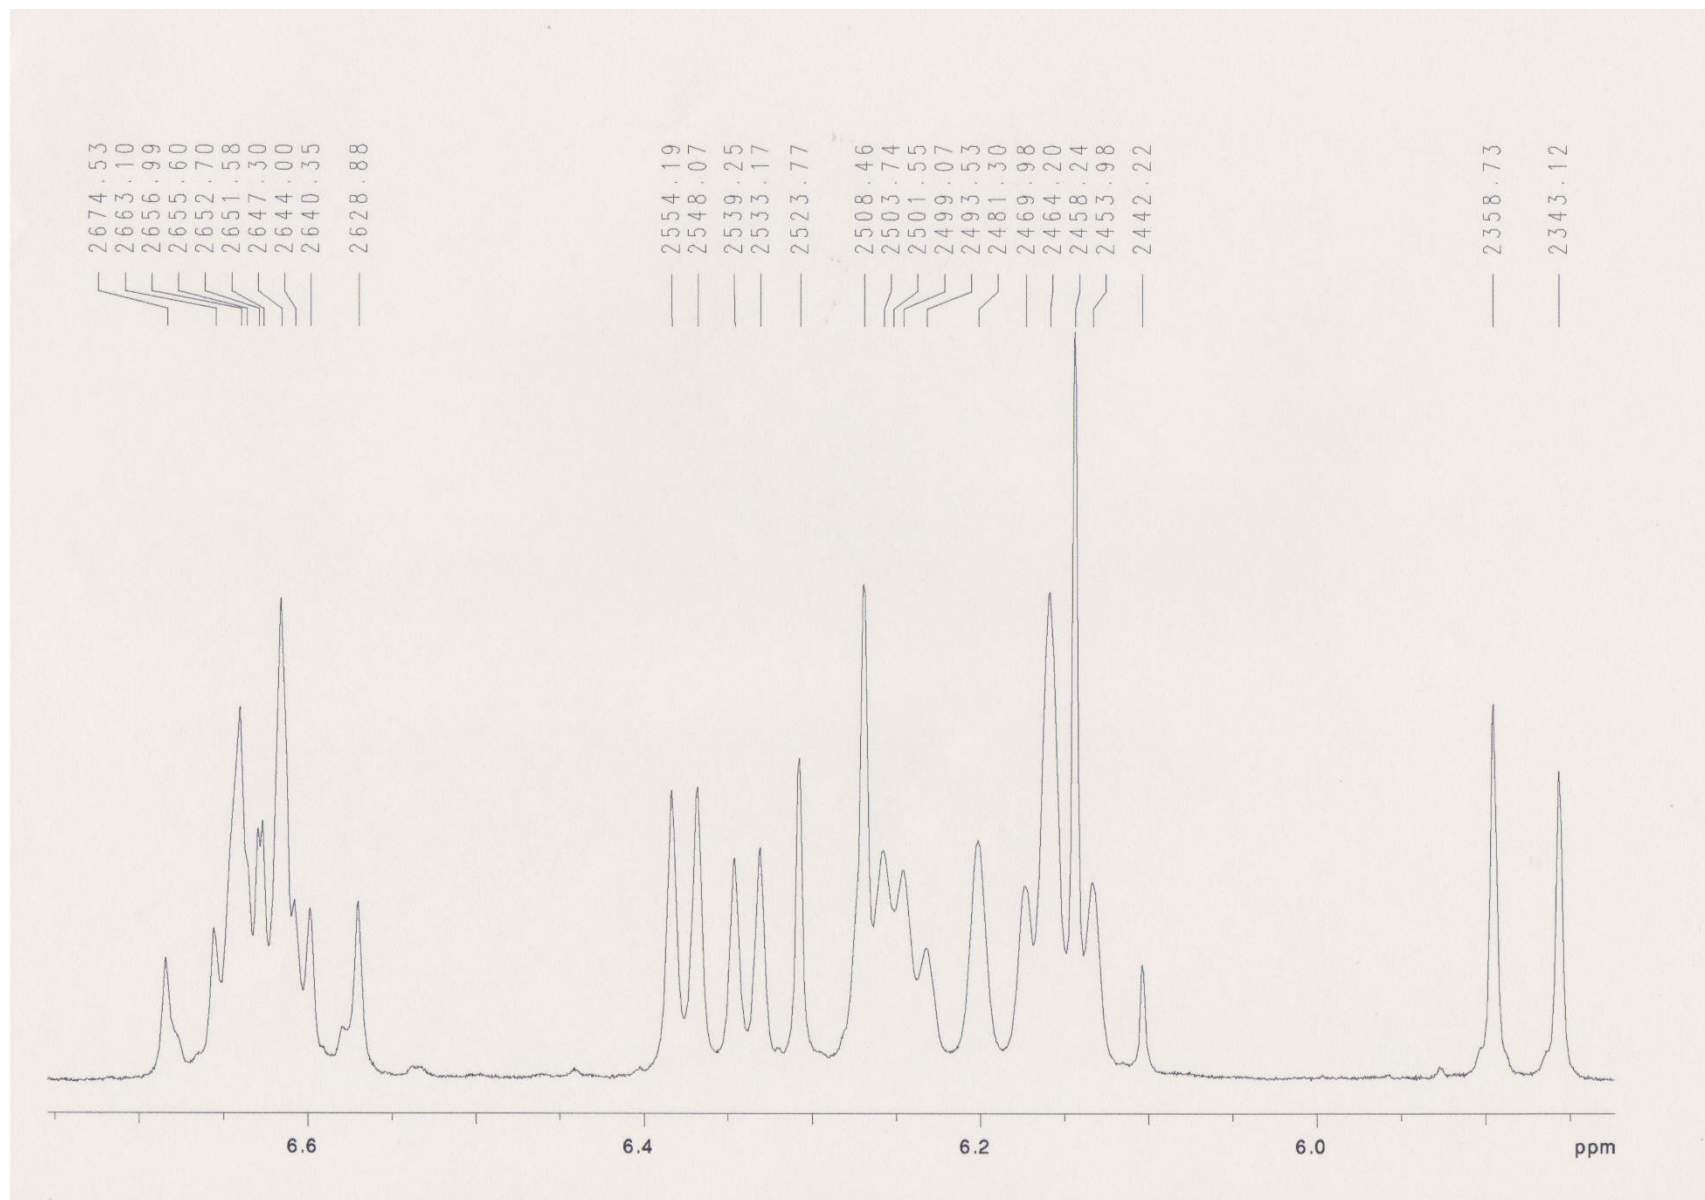

**Figure S2.c.**  $^1\text{H}$ -NMR spectrum of  $\beta$ -carotene 5,6-epoxide (**10**) in  $\text{CDCl}_3$  (400 MHz) (0.9-2.1 ppm)

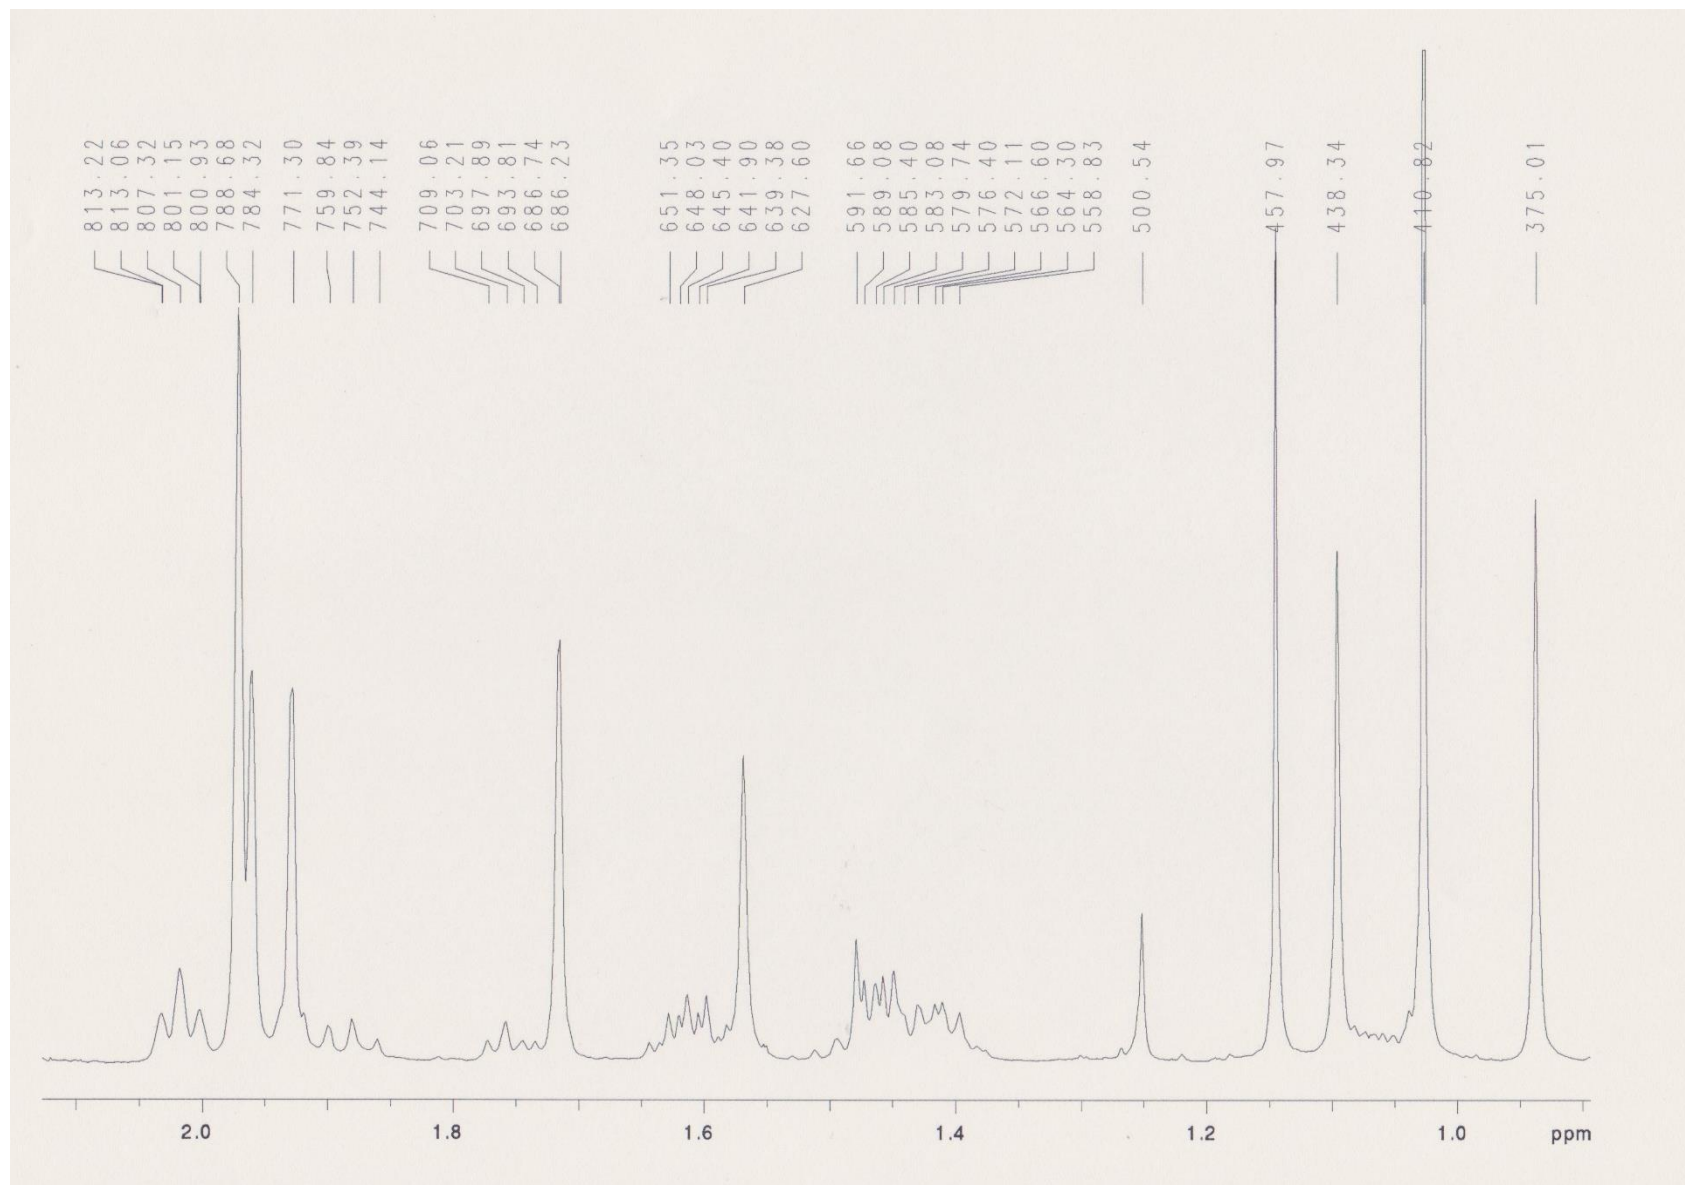



**Figure S3.a.**  $^1\text{H}$ ,  $^1\text{H}$ -COSY NMR spectrum of  $\beta$ -carotene 5,6-epoxide (**10**) in  $\text{CDCl}_3$  (400 MHz)

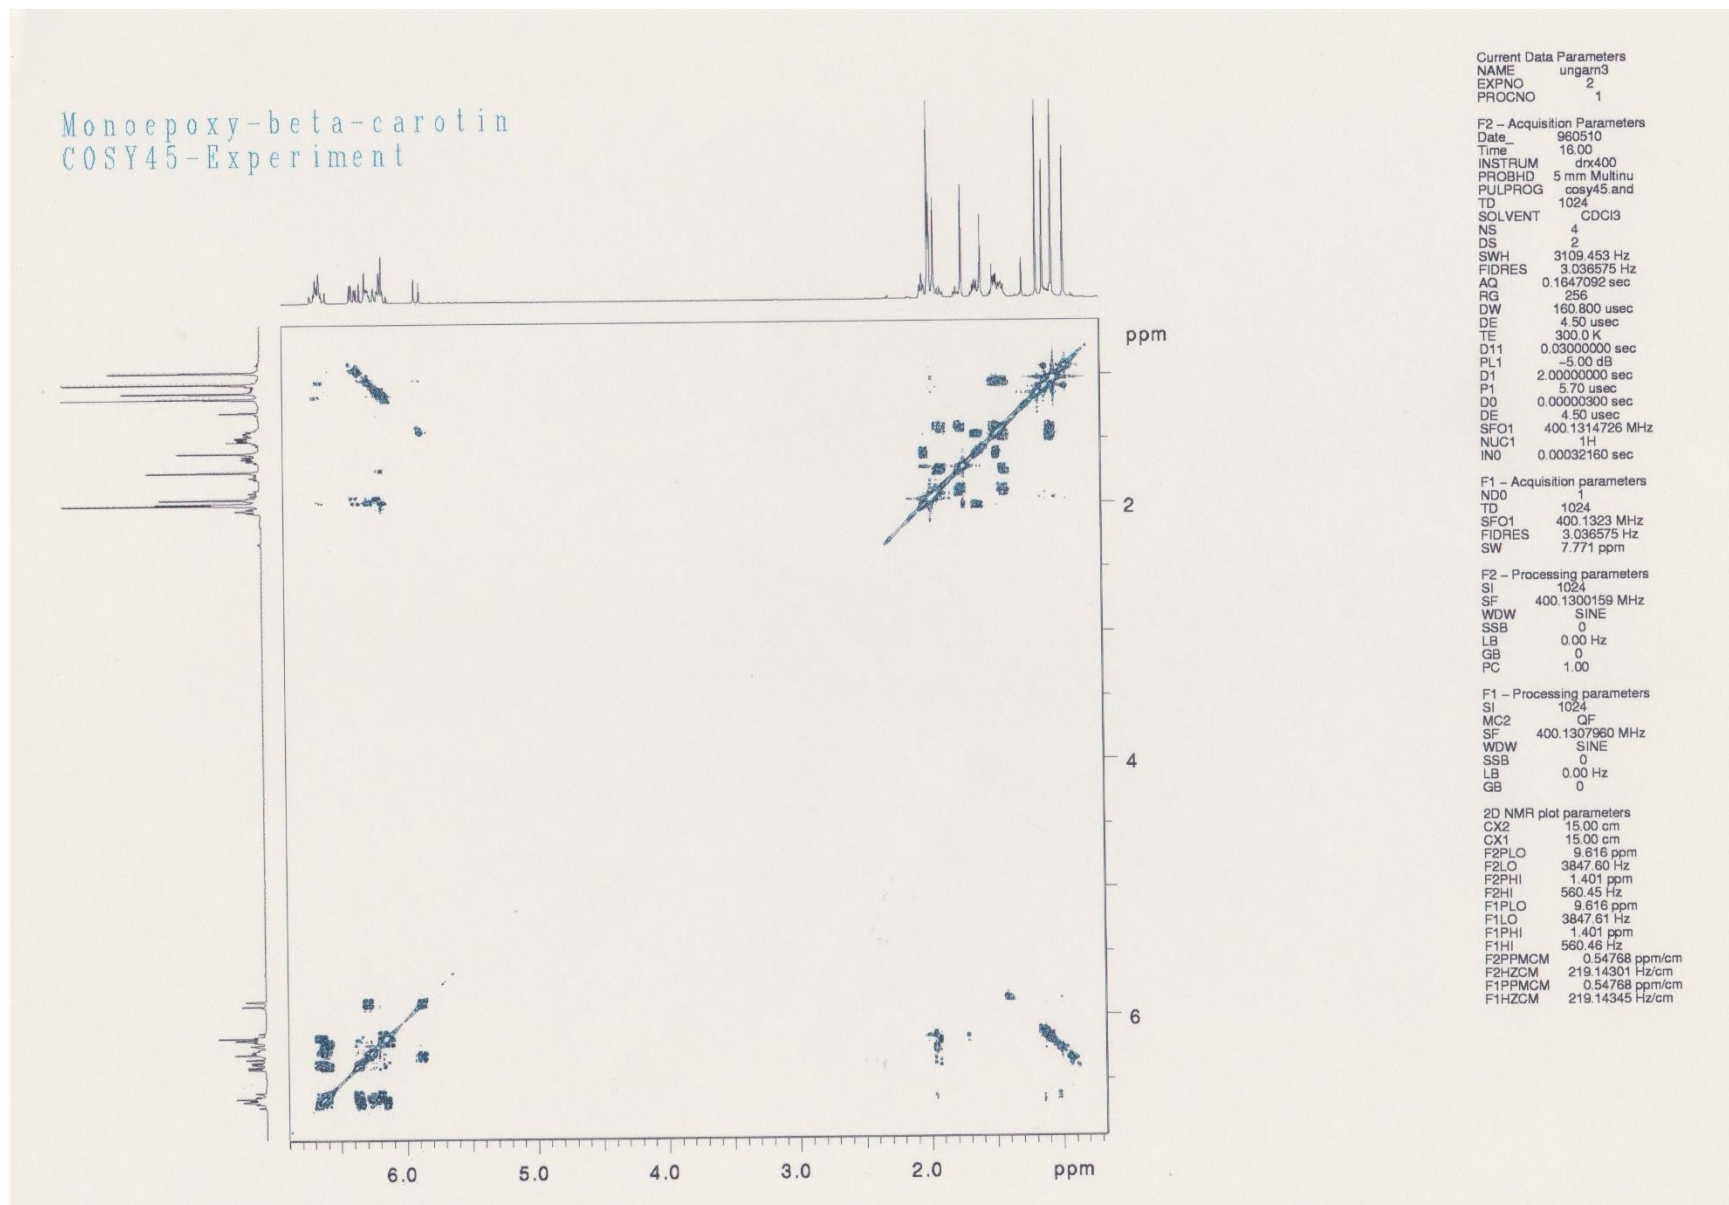

**Figure S3.b.**  $^1\text{H}$ ,  $^1\text{H}$ -COSY NMR spectrum of  $\beta$ -carotene 5,6-epoxide (**10**) in  $\text{CDCl}_3$  (400 MHz) (0-2.1 ppm)

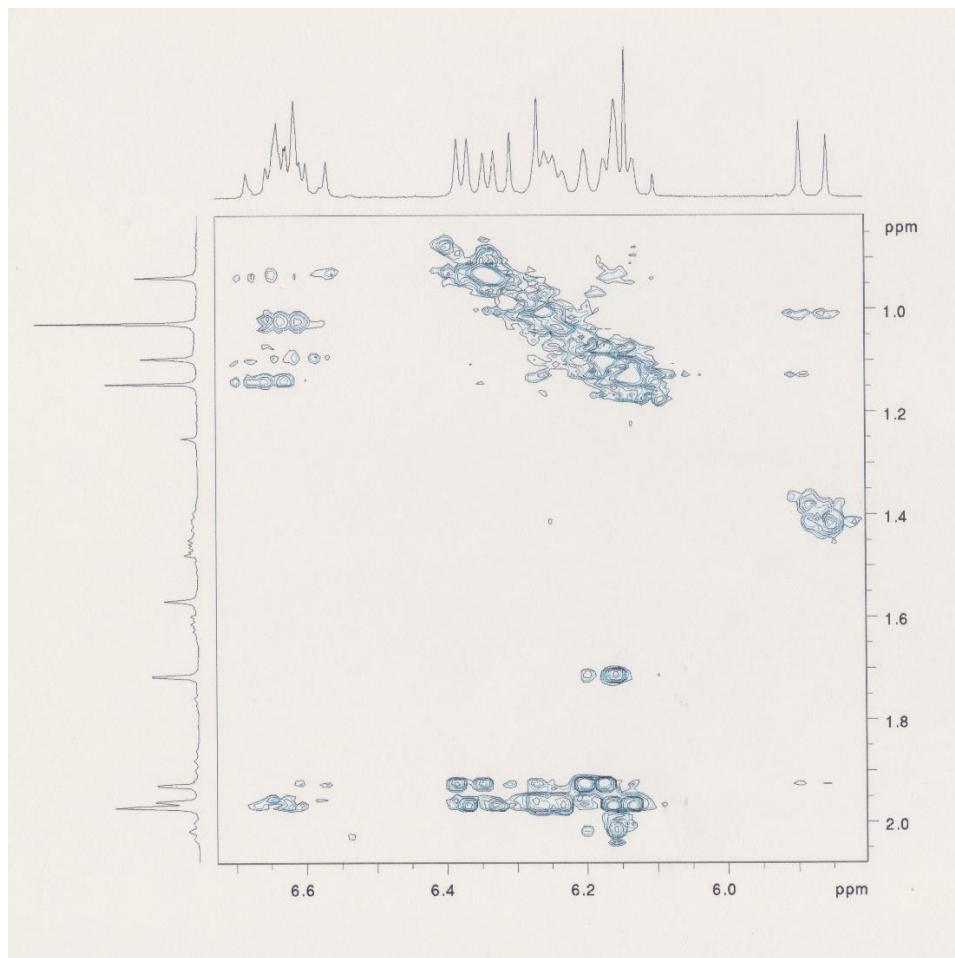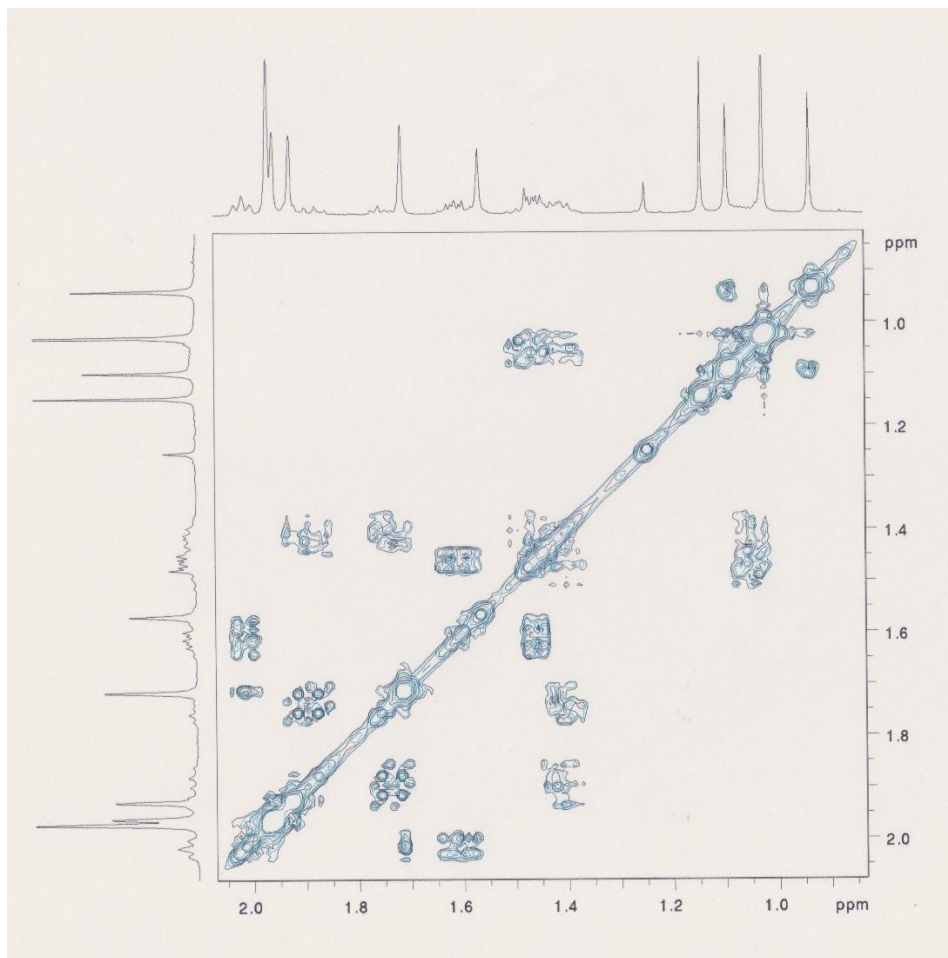



**Figure S3.c.**  $^1\text{H},^1\text{H}$ -COSY NMR spectrum of  $\beta$ -carotene 5,6-epoxide (**10**) in  $\text{CDCl}_3$  (400 MHz) (5.8-6.7 ppm)

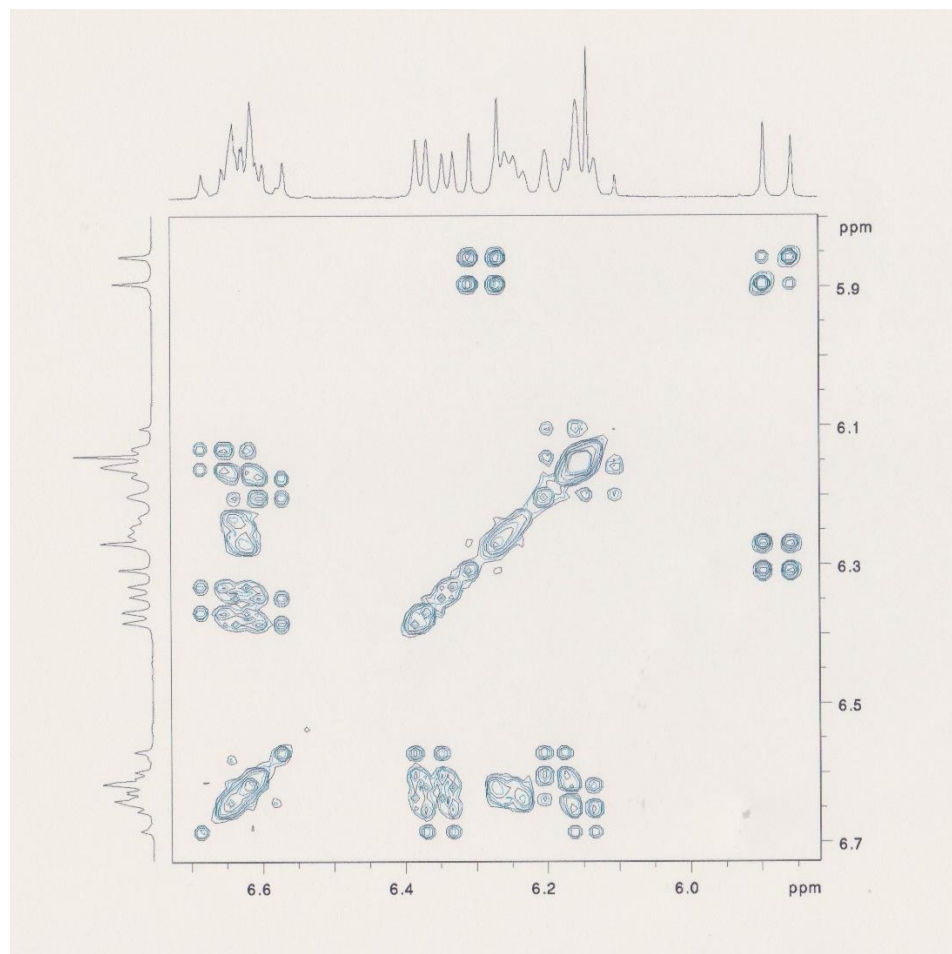

**Figure S4.a.**  $^{13}\text{C}$ -NMR spectrum of  $\beta$ -carotene 5,6-epoxide (**10**) in  $\text{CDCl}_3$

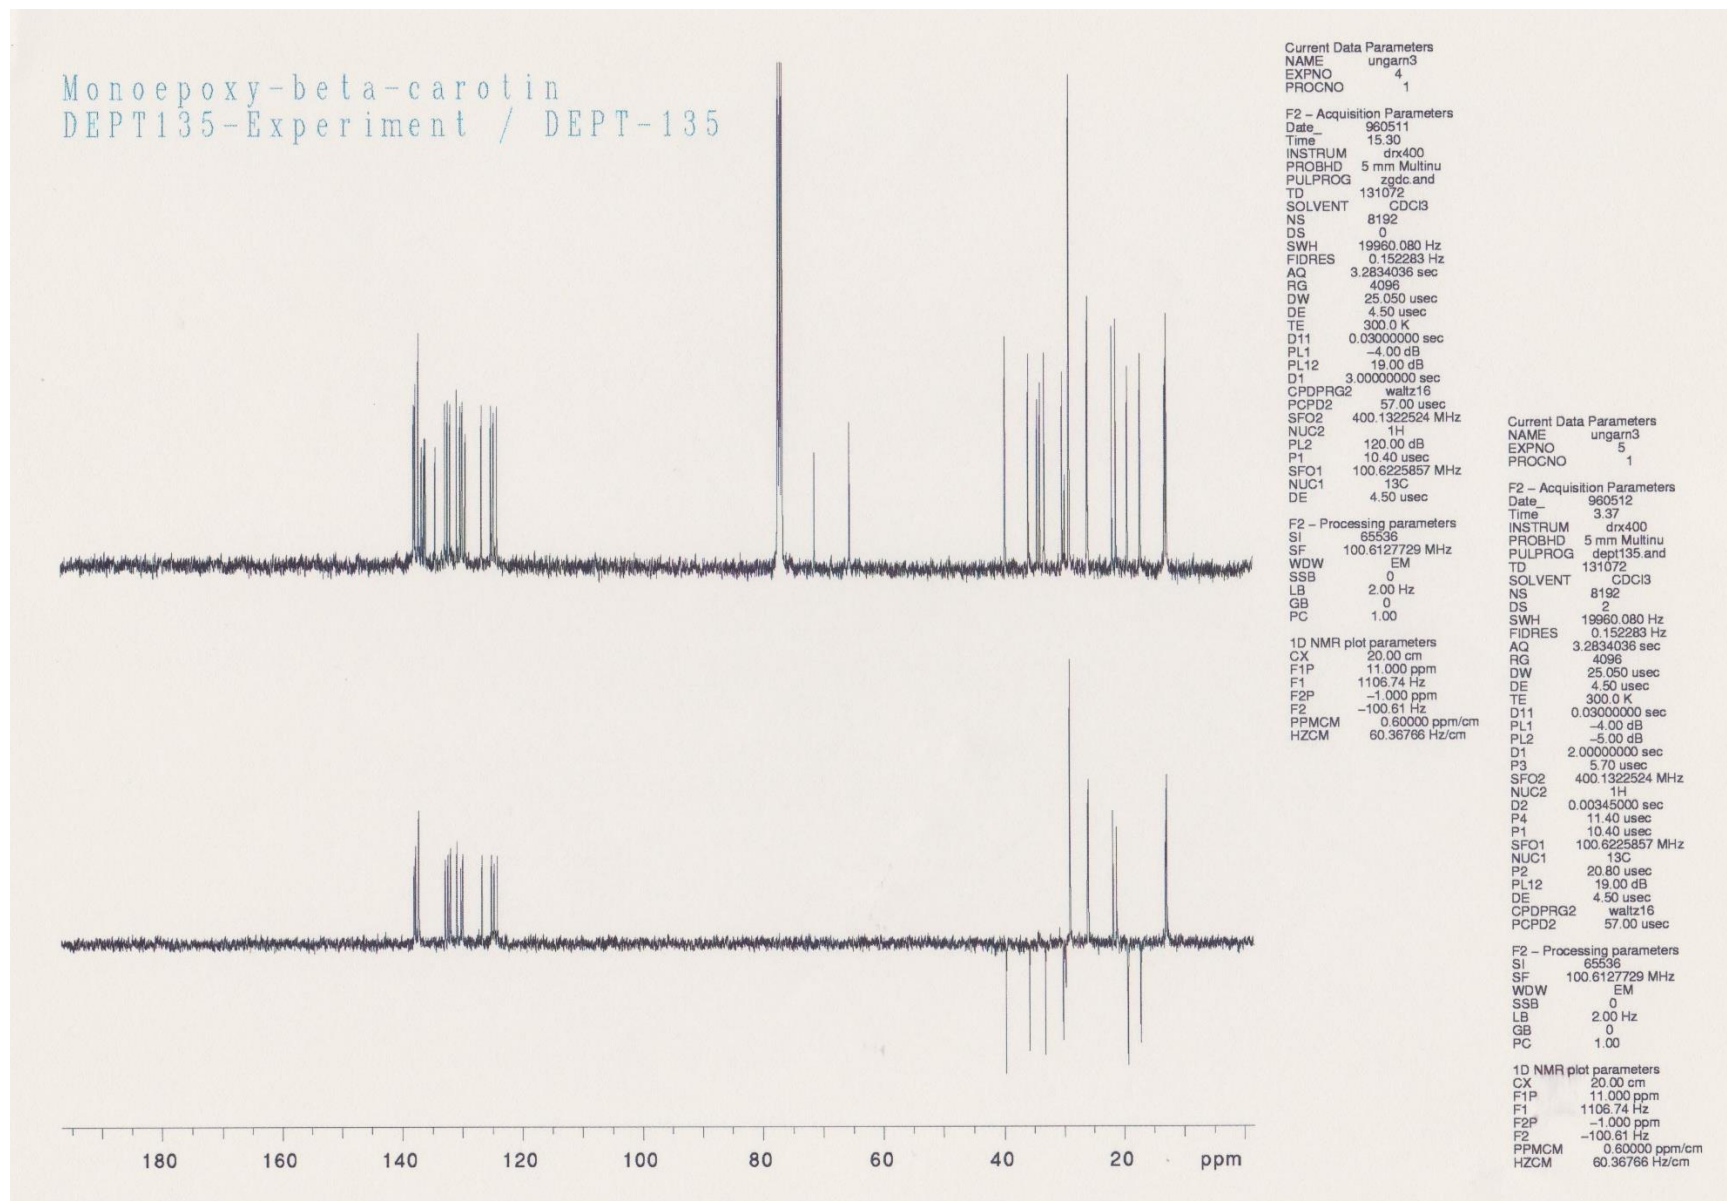

**Figure S4.b.**  $^{13}\text{C}$ -NMR spectrum of  $\beta$ -carotene 5,6-epoxide (**10**) in  $\text{CDCl}_3$  (124-138 ppm)

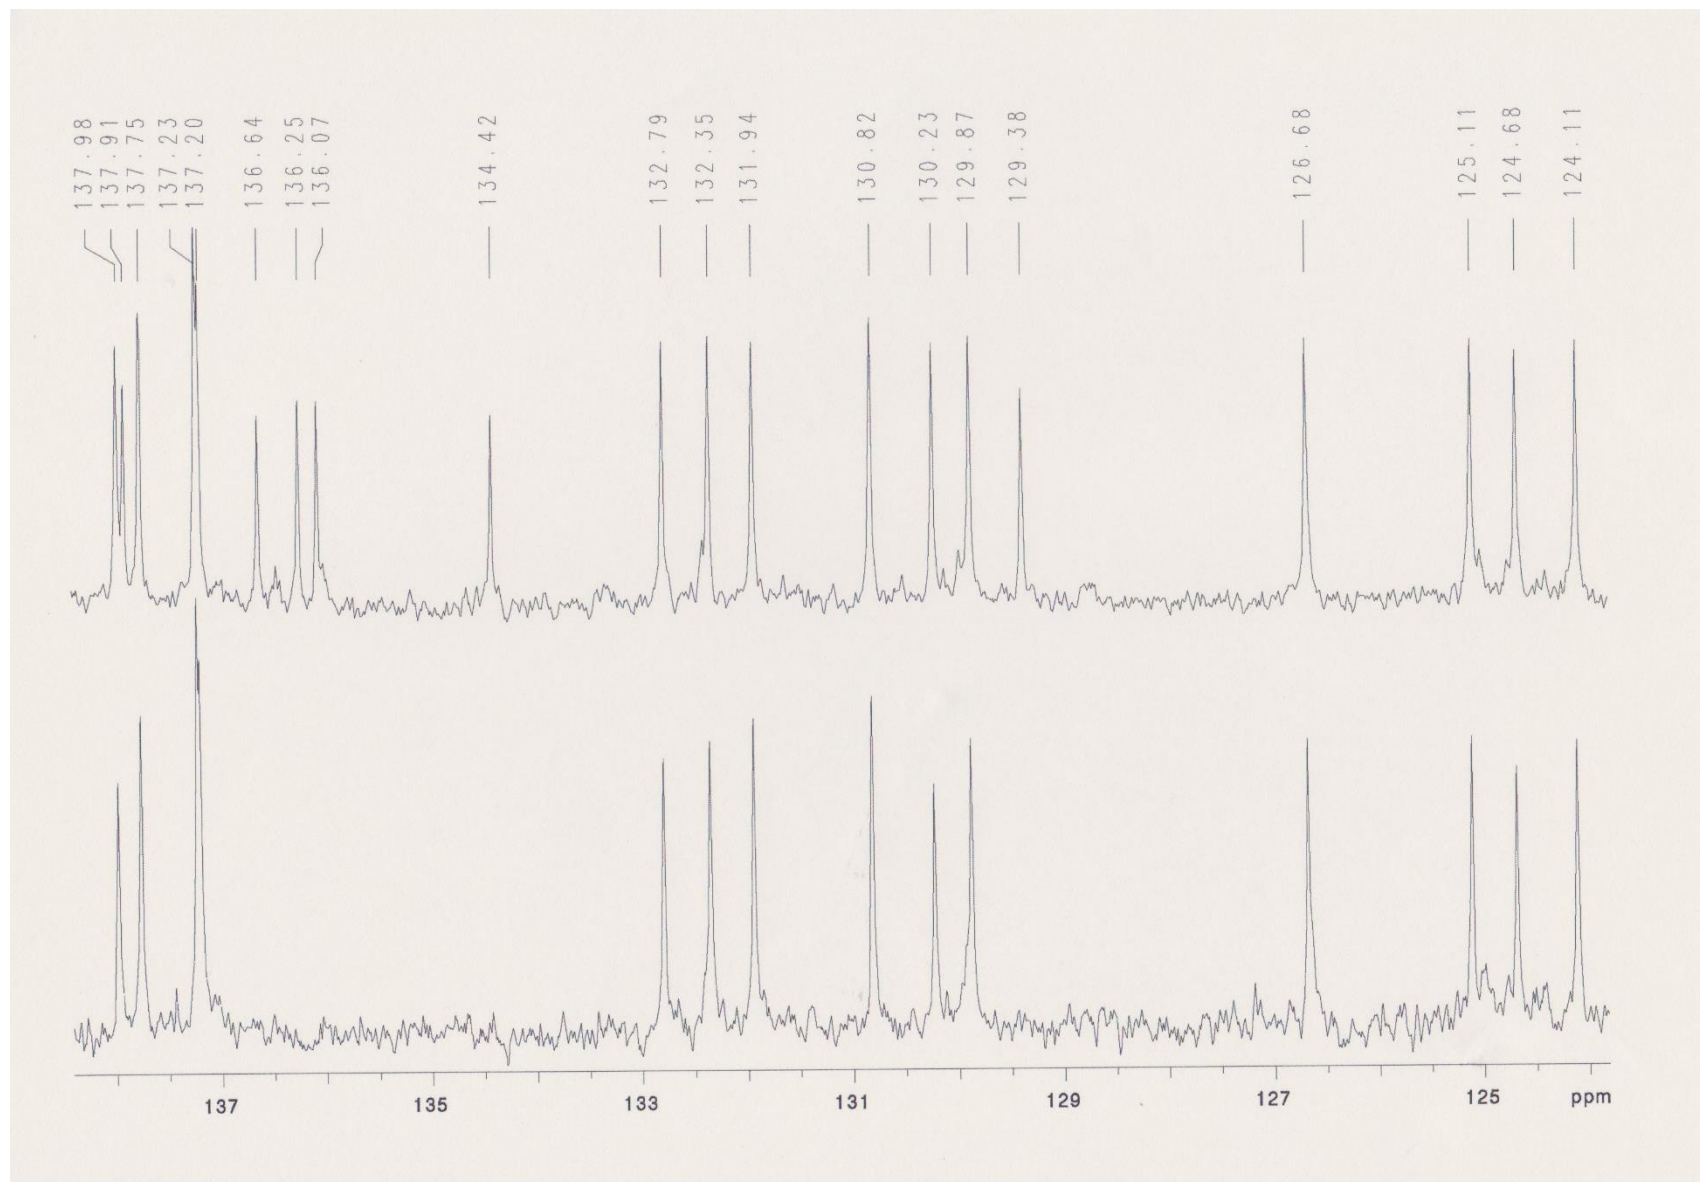

**Figure S4.c.**  $^{13}\text{C}$ -NMR spectrum of  $\beta$ -carotene 5,6-epoxide (**10**) in  $\text{CDCl}_3$  (10-72 ppm)

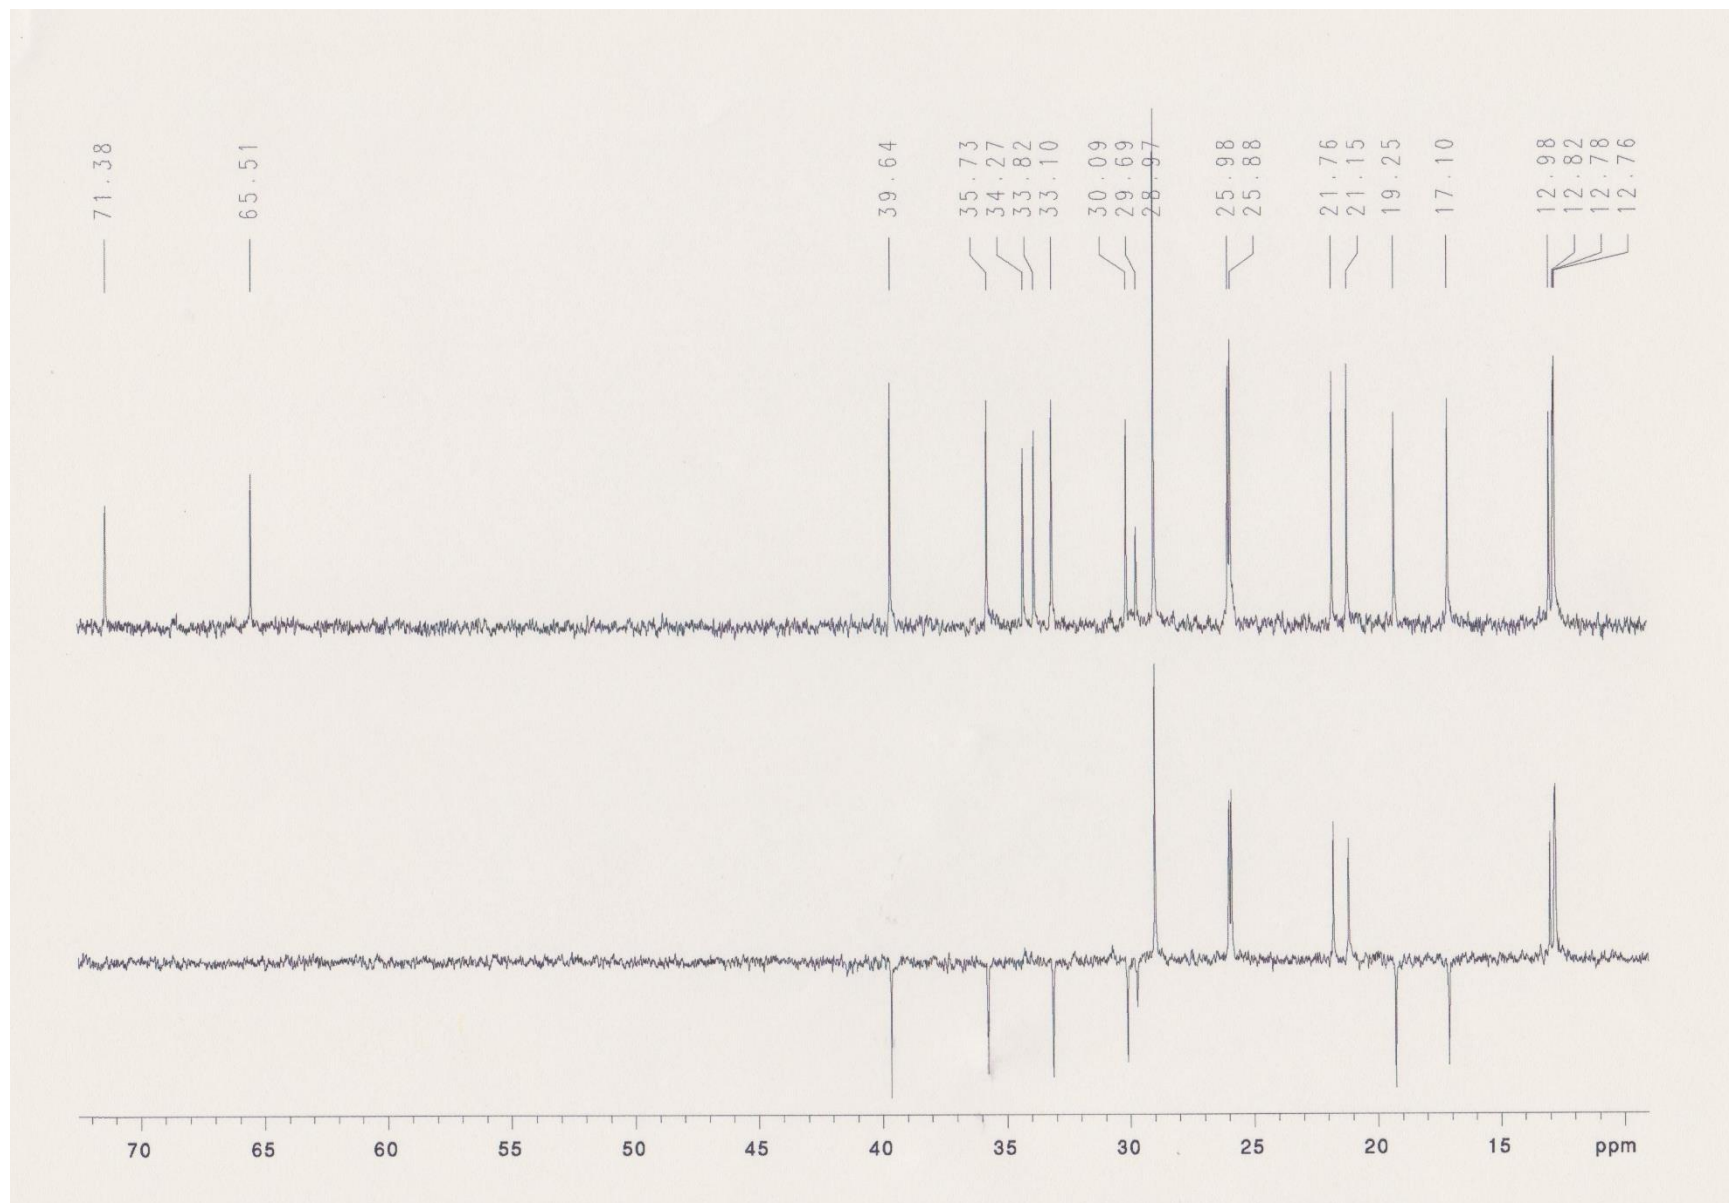



**Figure S5.a**  $^1\text{H}$ ,  $^{13}\text{C}$ -HMQC NMR spectrum of  $\beta$ -carotene 5,6-epoxide (**10**) in  $\text{CDCl}_3$

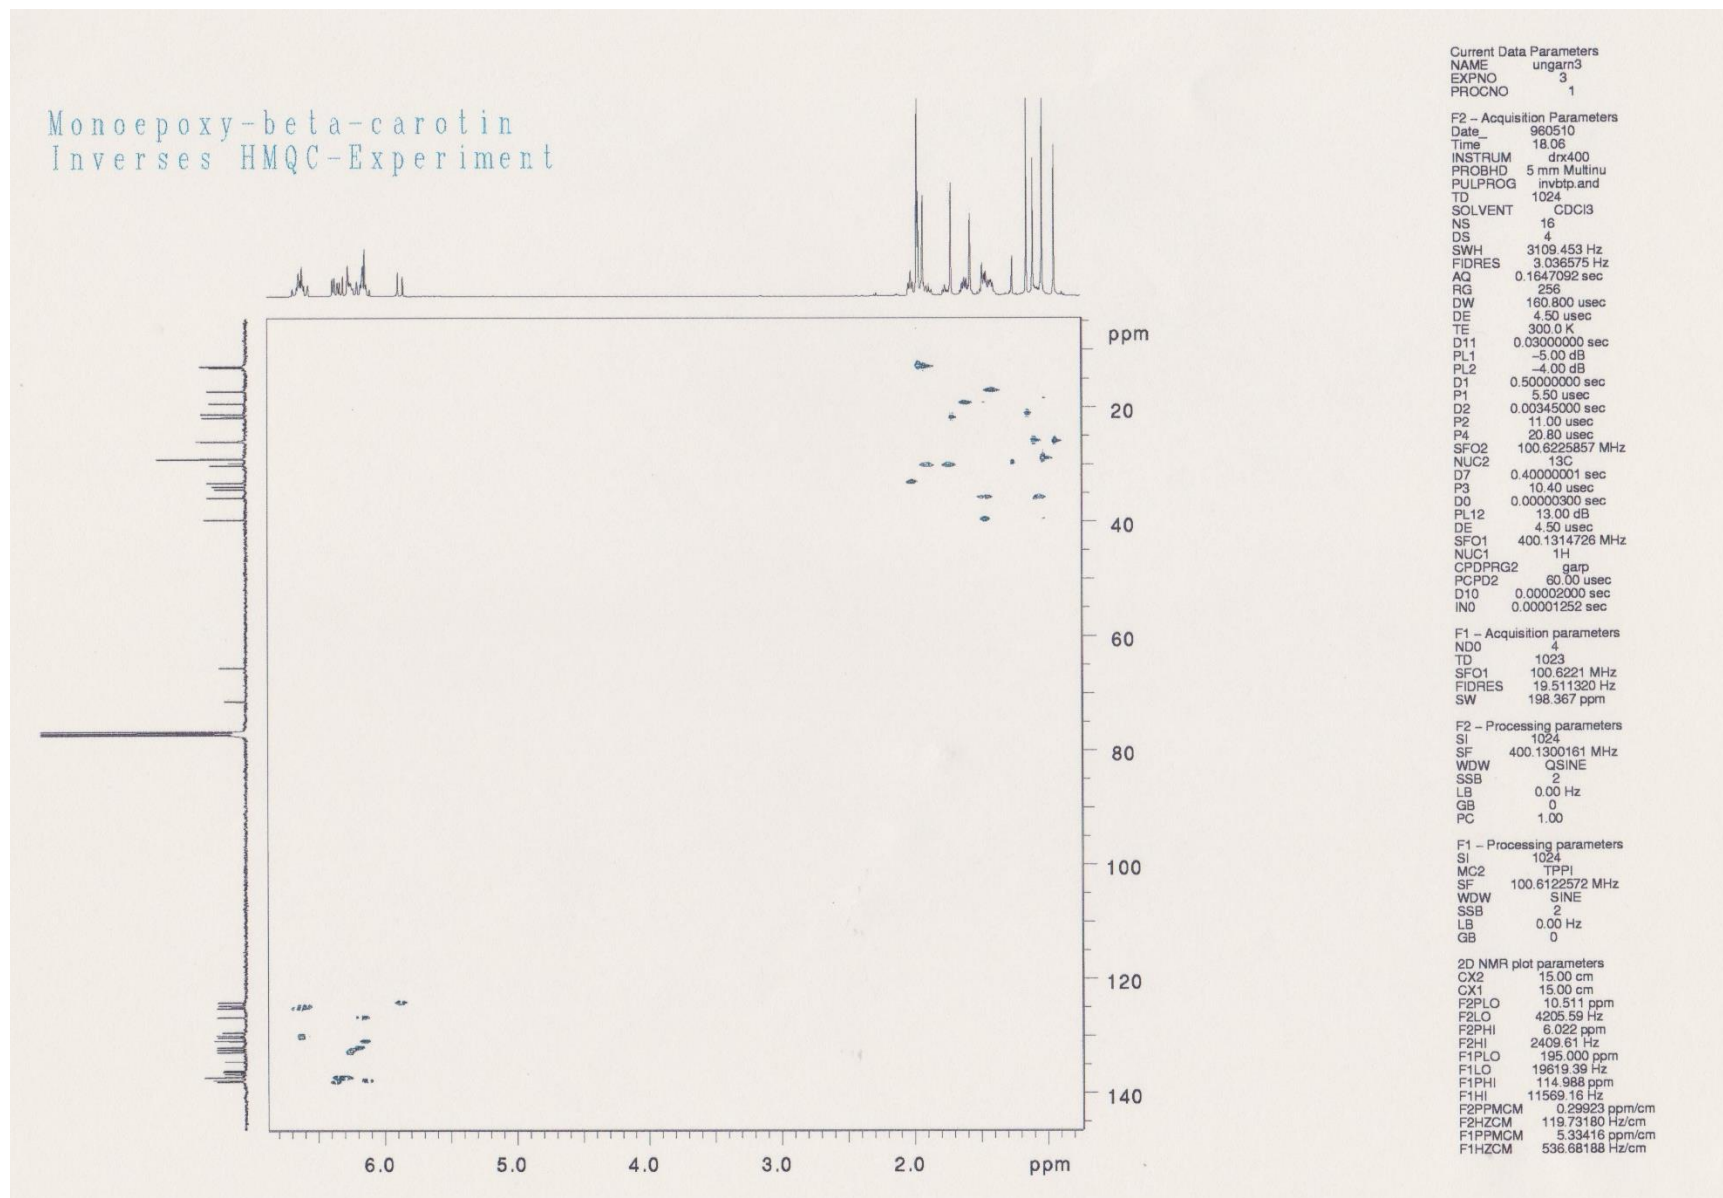

**Figure S5.b**  $^1\text{H}$ ,  $^{13}\text{C}$ -HMQC NMR spectrum of  $\beta$ -carotene 5,6-epoxide (**10**) in  $\text{CDCl}_3$  (10-72 ppm)

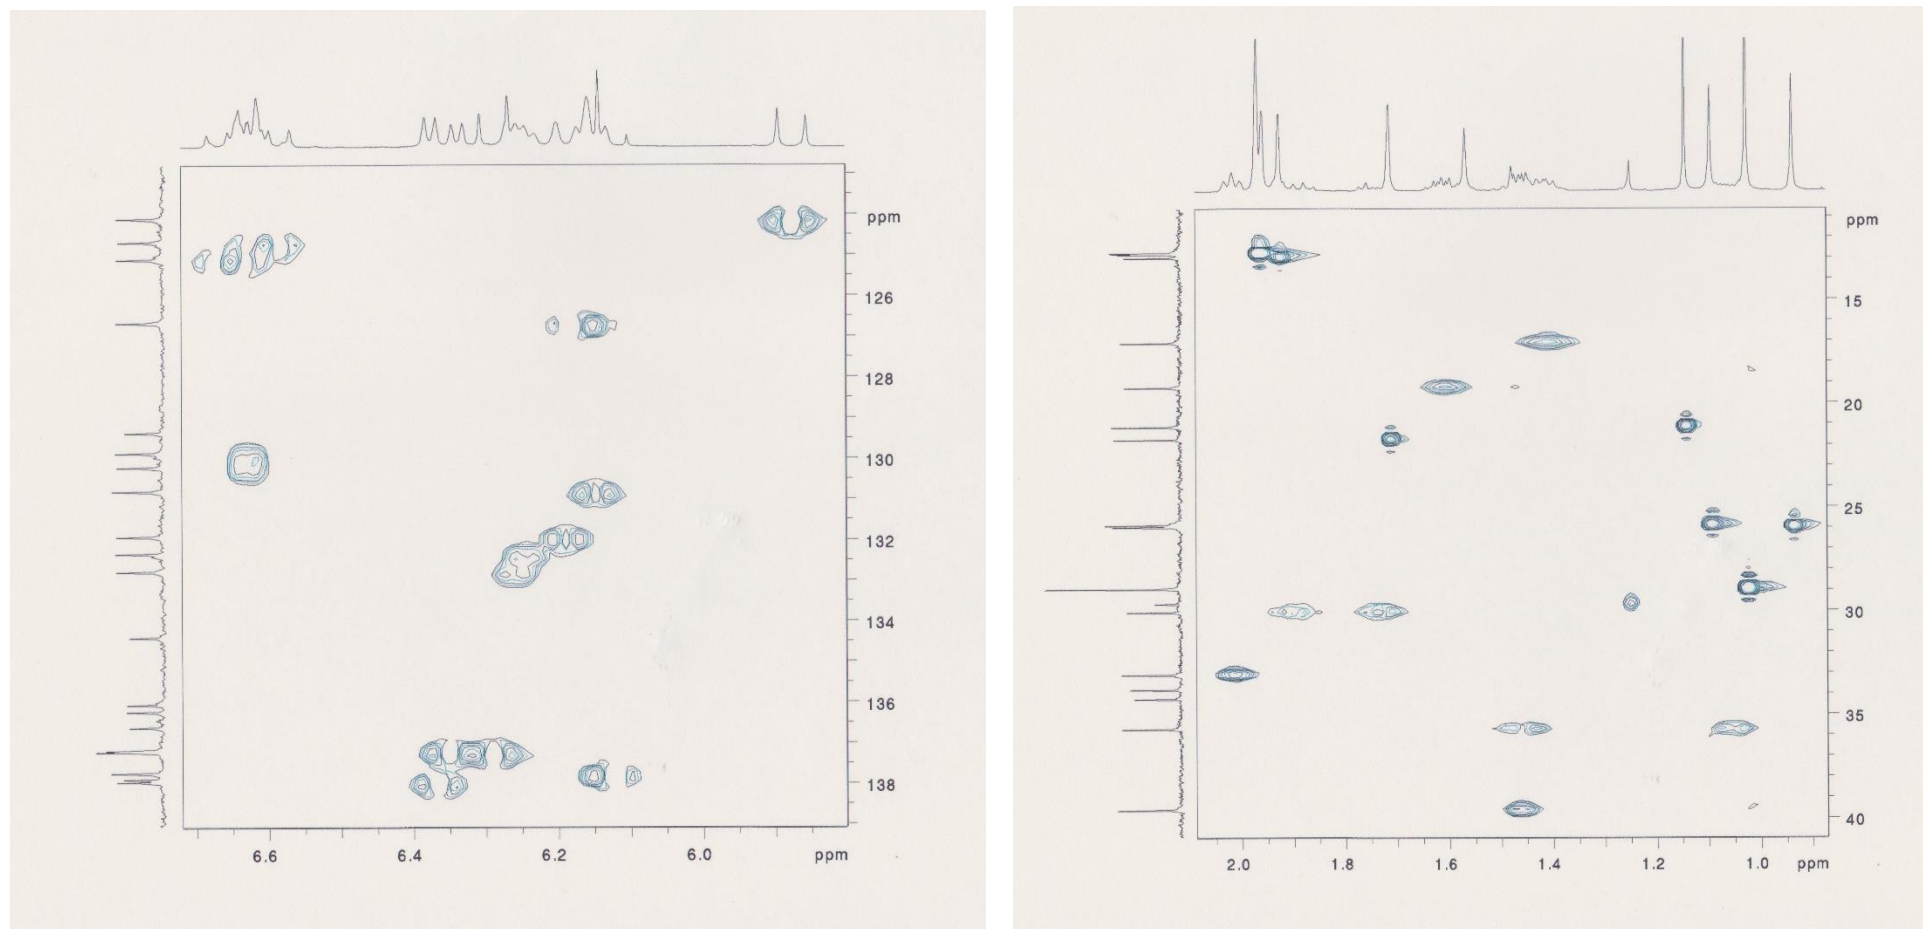



**Figure S6.a.**  $^1\text{H}$ -NMR spectrum of  $\beta$ -carotene 5,6,5',6'-diepoxide (**11**) in  $\text{CDCl}_3$  (400 MHz)

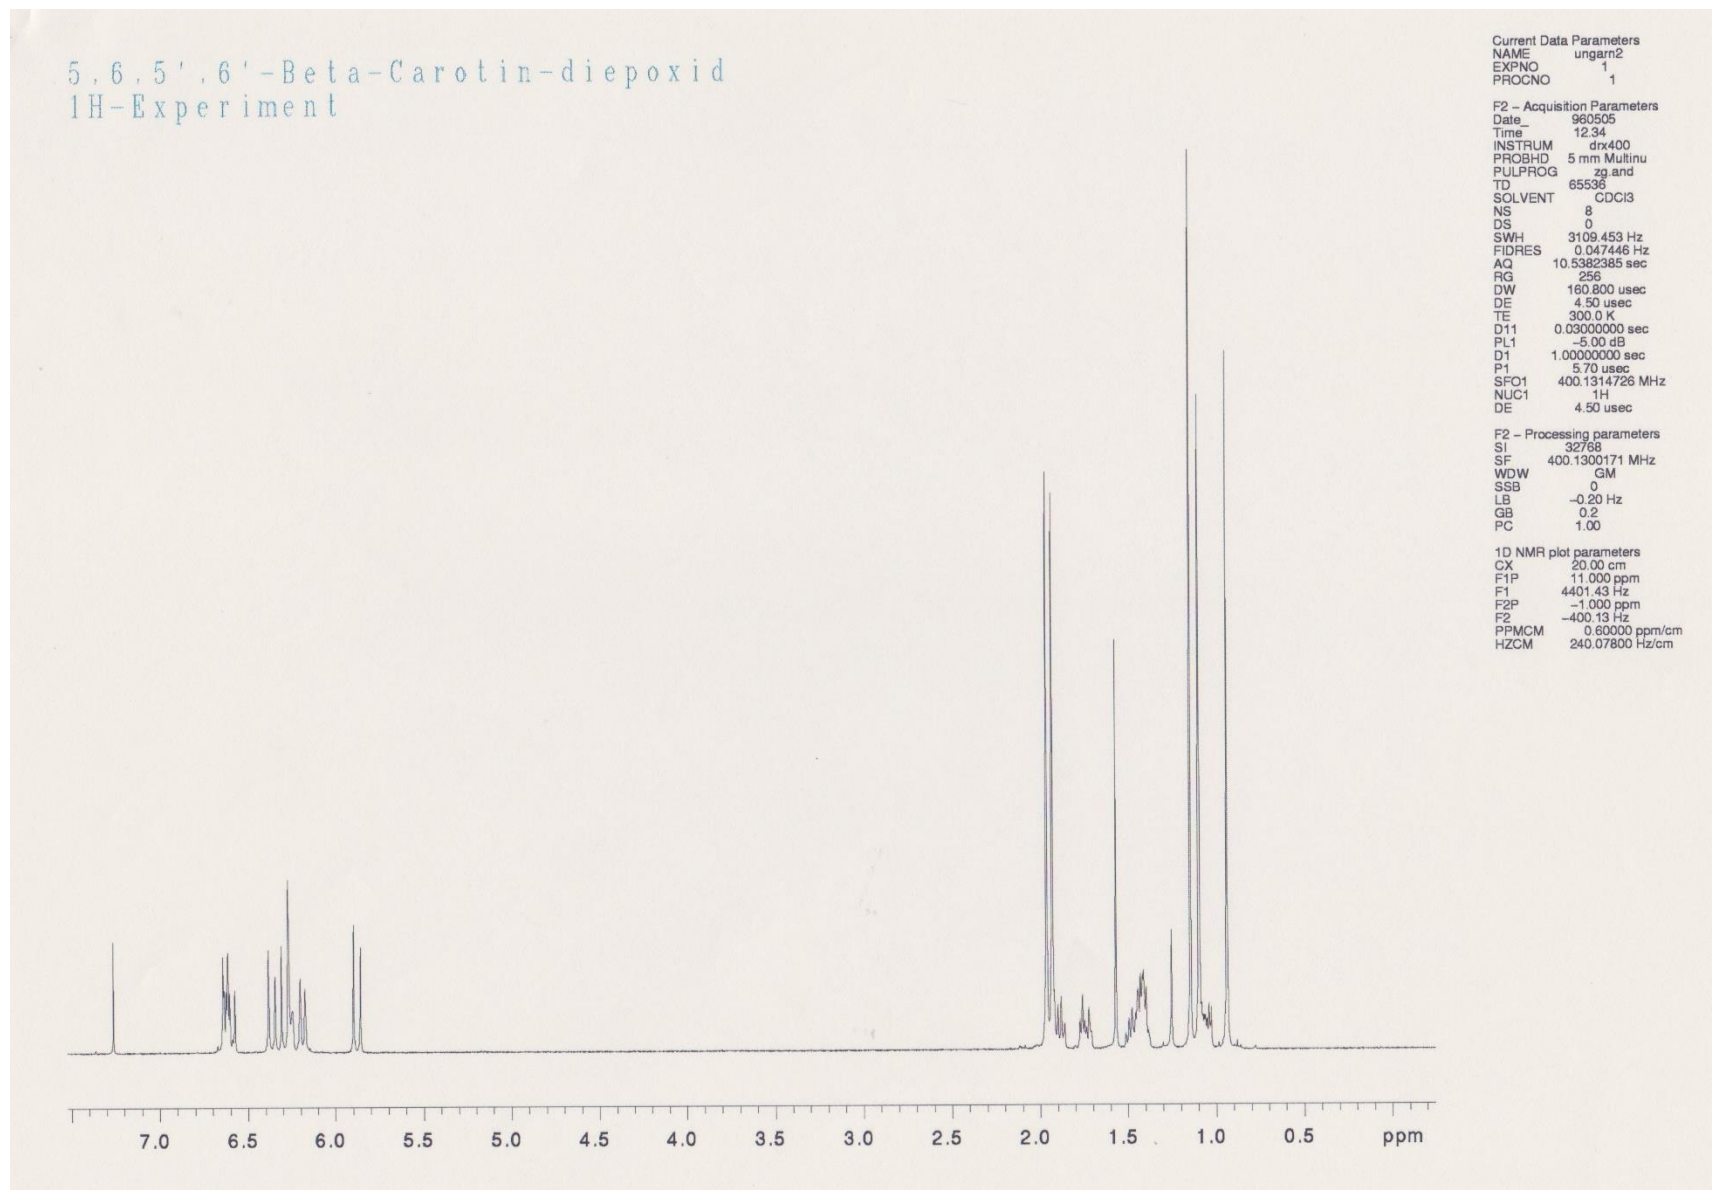

**Figure S6.b.**  $^1\text{H}$ -NMR spectrum of  $\beta$ -carotene 5,6,5',6'-diepoxide (**11**) in  $\text{CDCl}_3$  (400 MHz) (5.8-6.7 ppm)

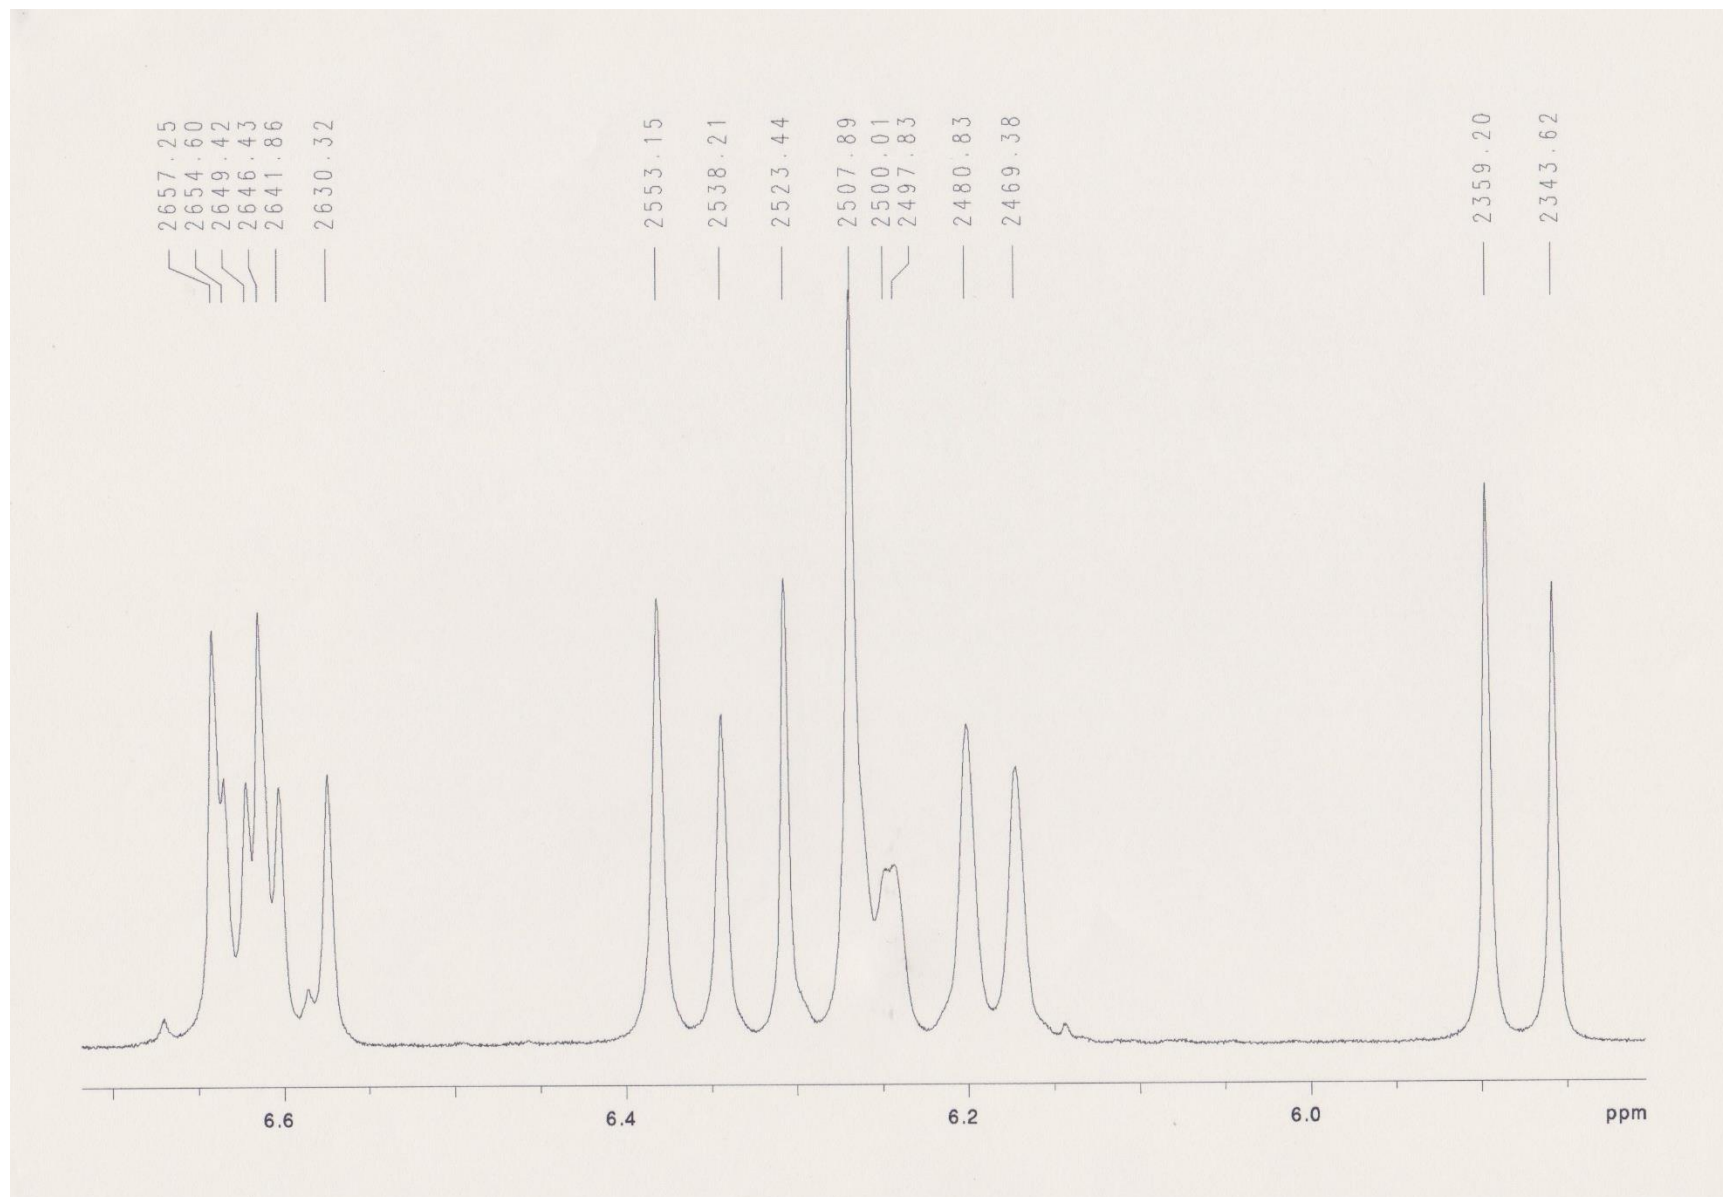

**Figure S6.c.**  $^1\text{H}$ -NMR spectrum of  $\beta$ -carotene 5,6,5',6'-diepoxide (**11**) in  $\text{CDCl}_3$  (400 MHz) (0.9-2.0 ppm)

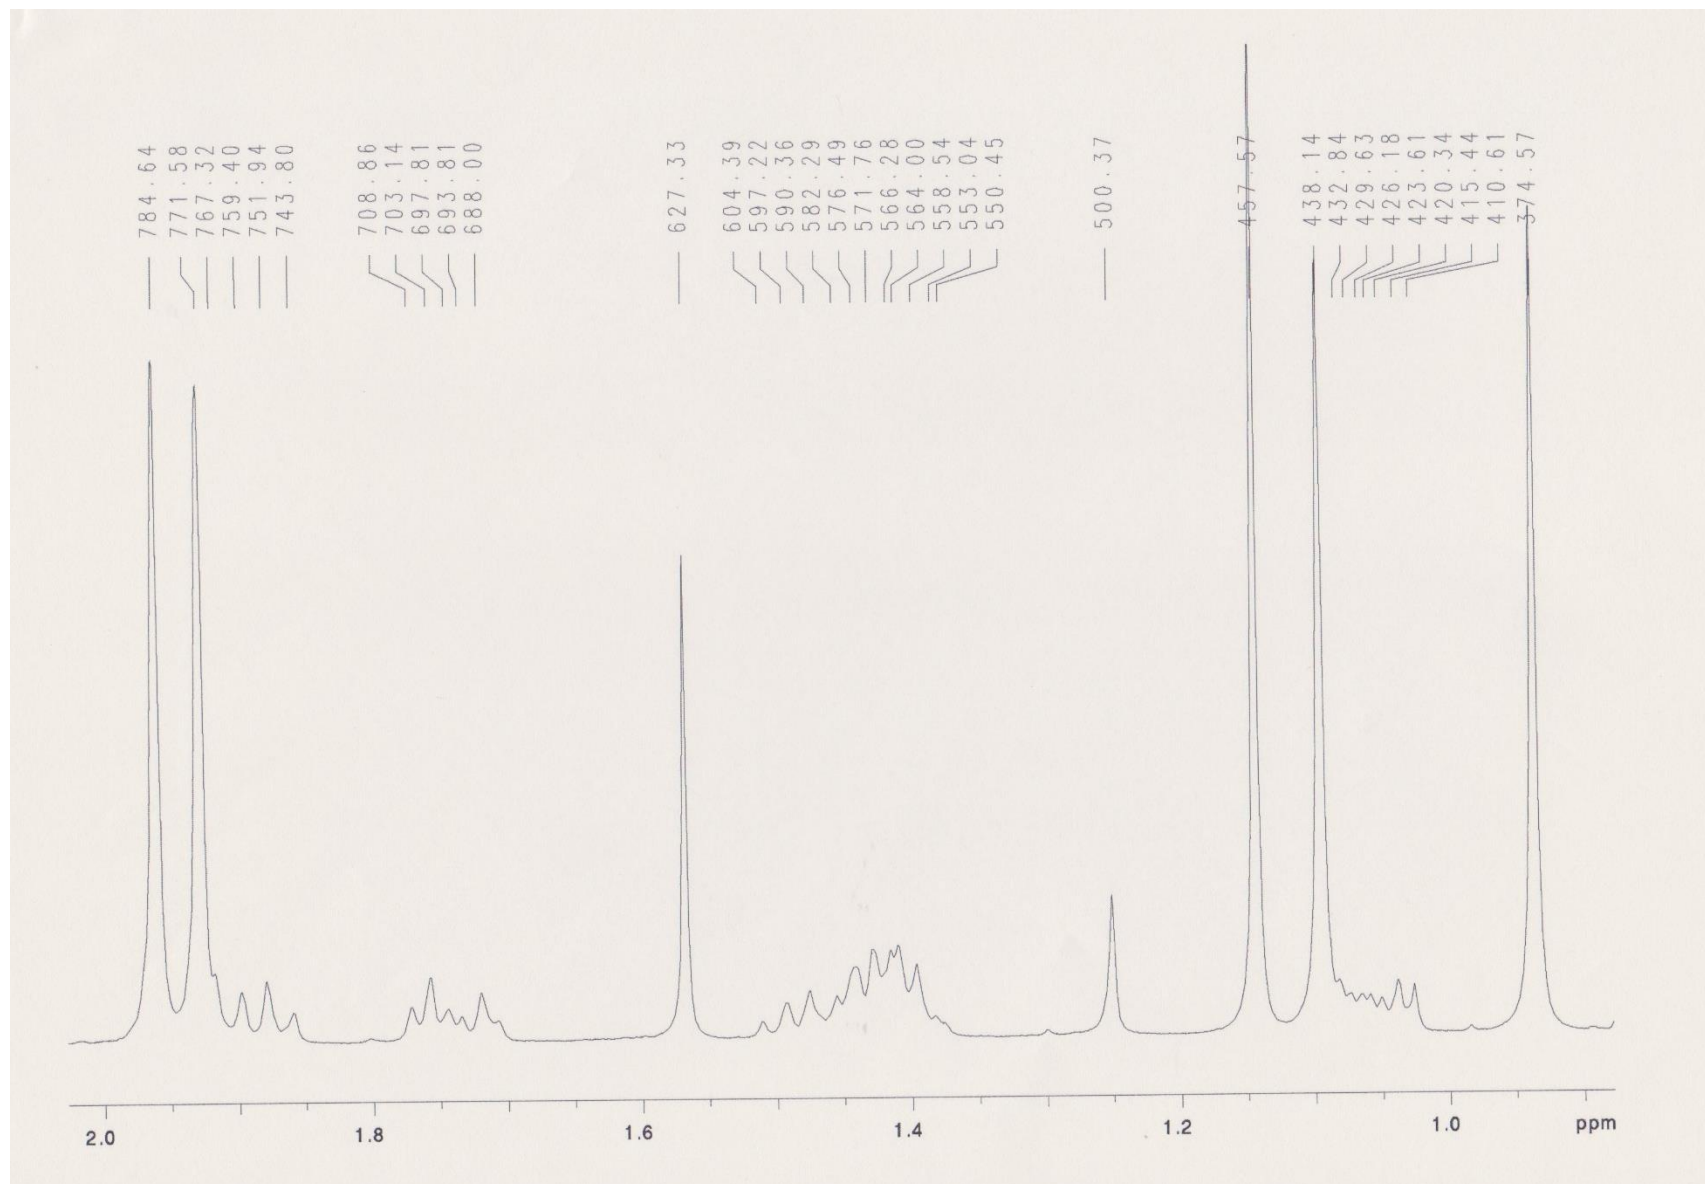

**Figure S7.a.**  $^1\text{H}$ ,  $^1\text{H}$ -COSY NMR spectrum of  $\beta$ -carotene 5,6,5',6'-diepoxide (**11**) in  $\text{CDCl}_3$  (400 MHz)

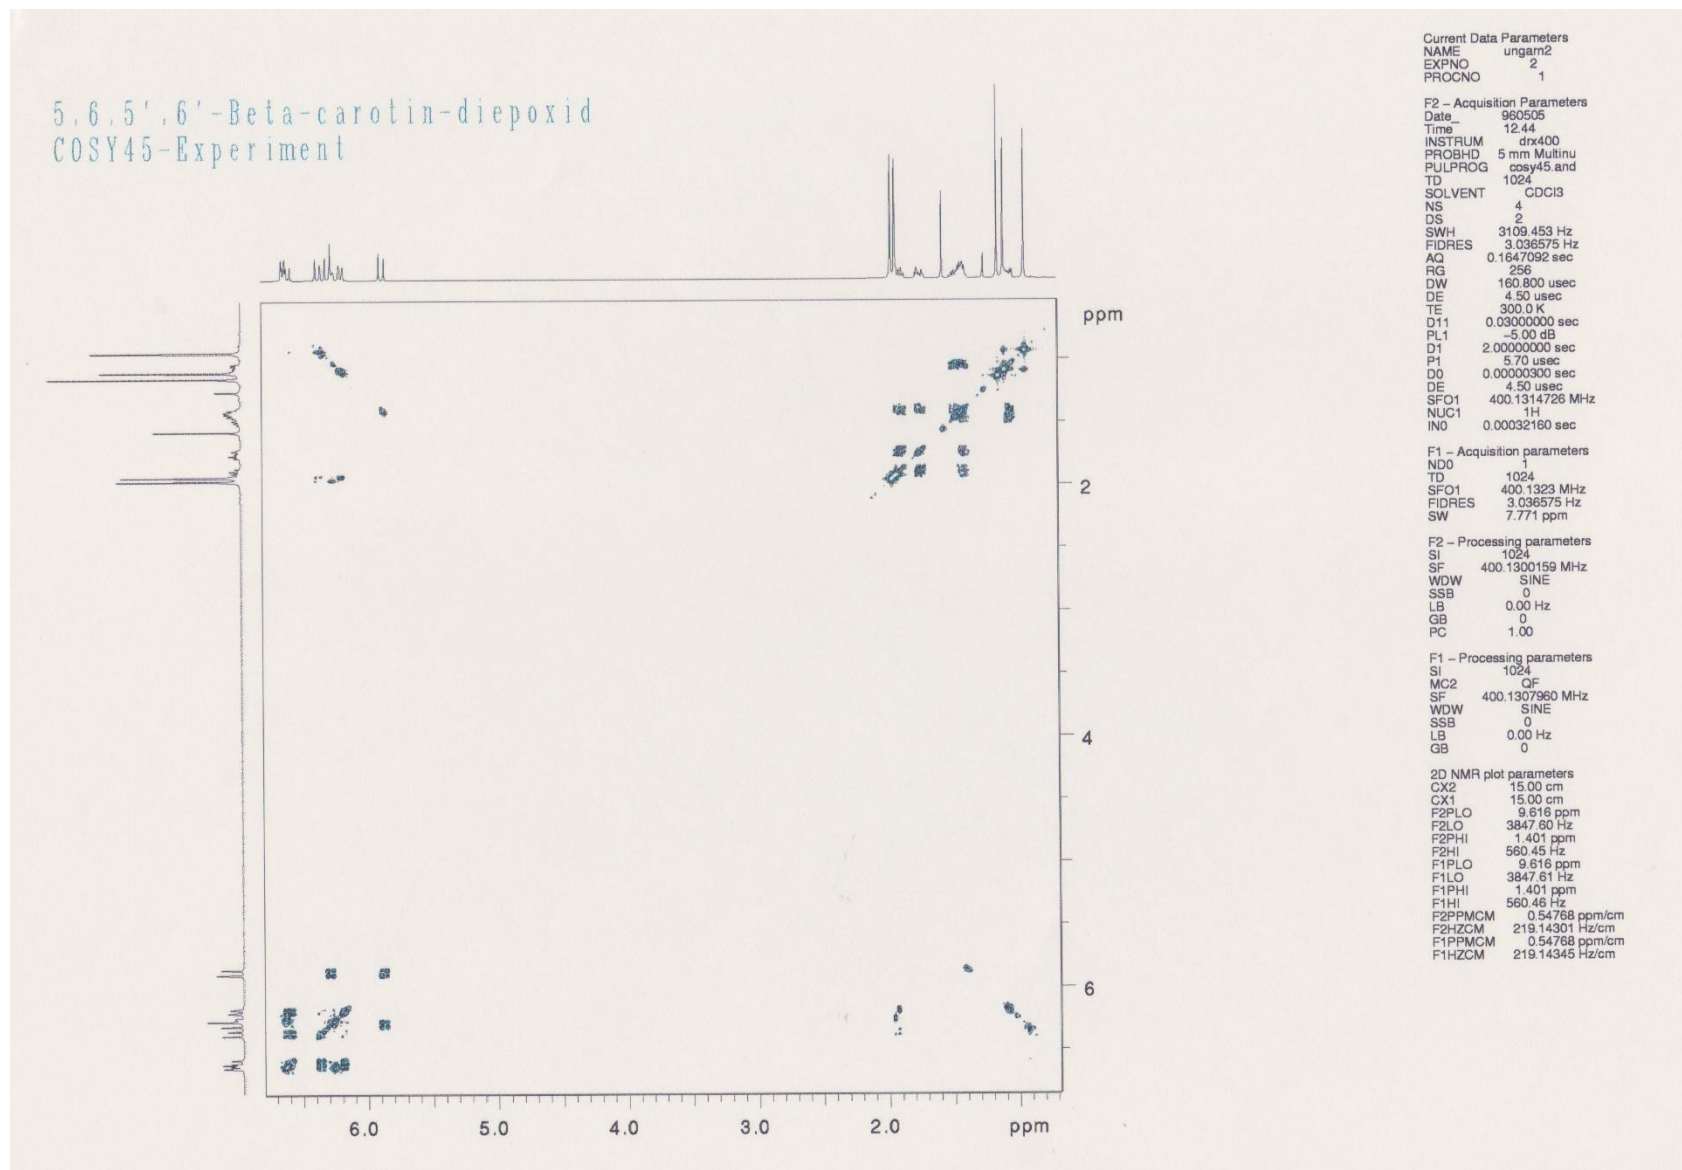



**Figure S7.b.**  $^1\text{H}$ ,  $^1\text{H}$ -COSY NMR spectrum of  $\beta$ -carotene 5,6,5',6'-diepoxide (**11**) in  $\text{CDCl}_3$  (400 MHz) (0.9-2.0 ppm)

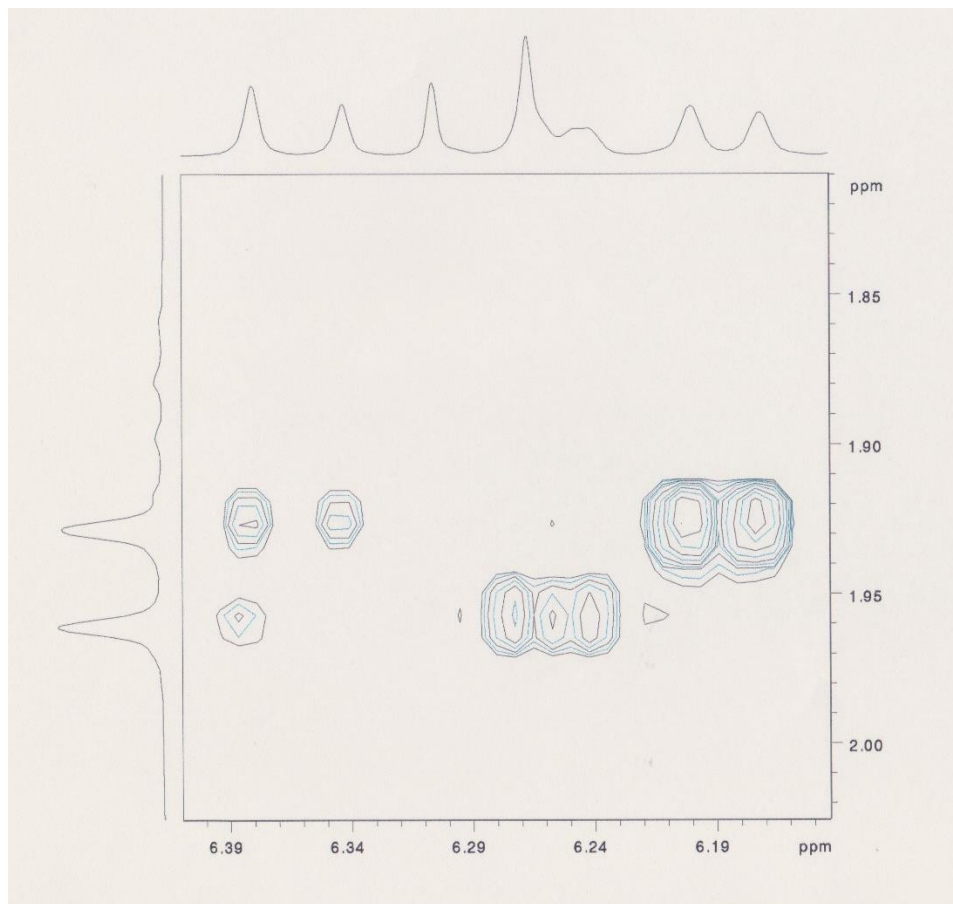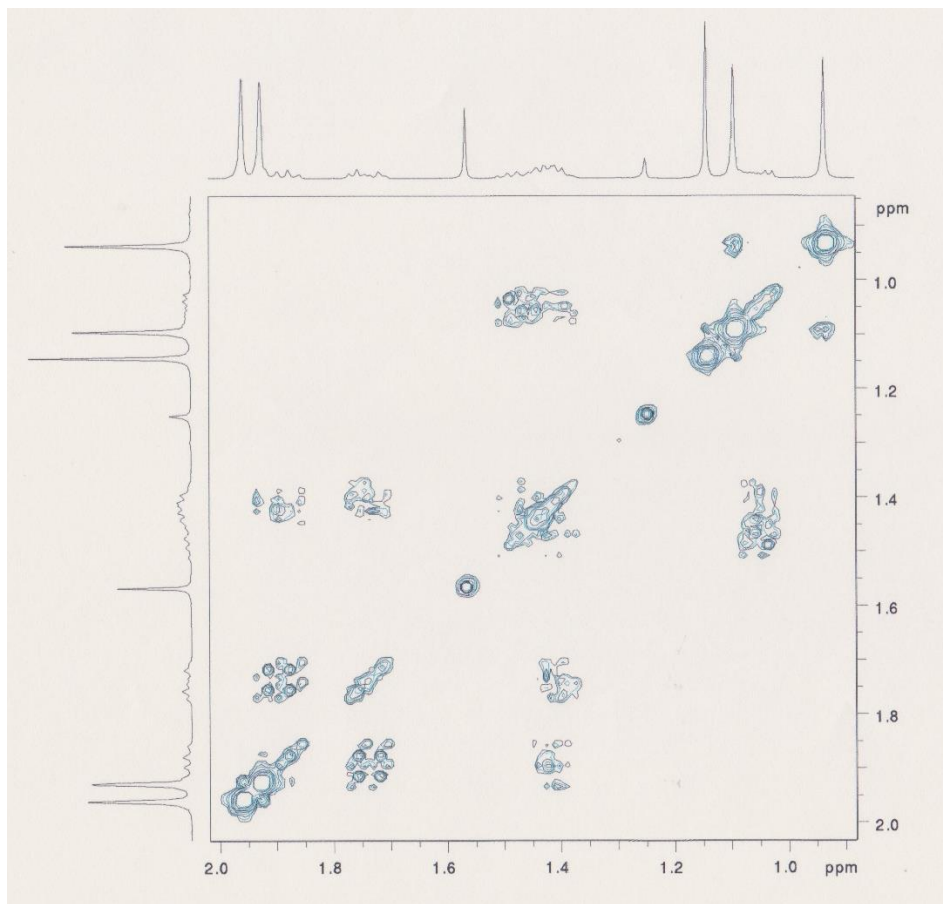

**Figure S7.c.**  $^1\text{H}$ ,  $^1\text{H}$ -COSY NMR spectrum of  $\beta$ -carotene 5,6,5',6'-diepoxide (**11**) in  $\text{CDCl}_3$  (400 MHz) (5.7-6.7 ppm)

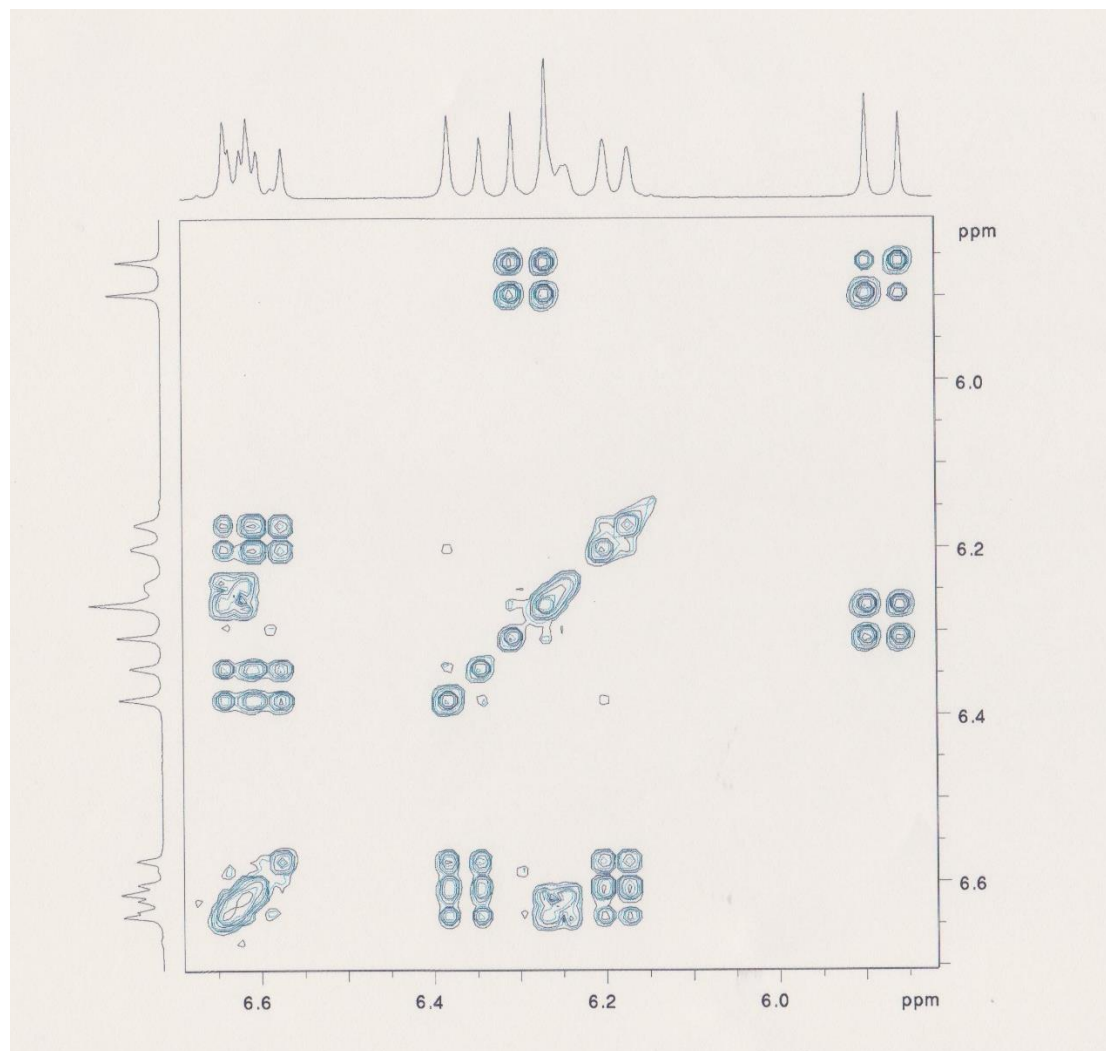



**Figure S8.**  $^{13}\text{C}$ -NMR spectrum of  $\beta$ -carotene 5,6,5',6'-diepoxide (**11**) in  $\text{CDCl}_3$

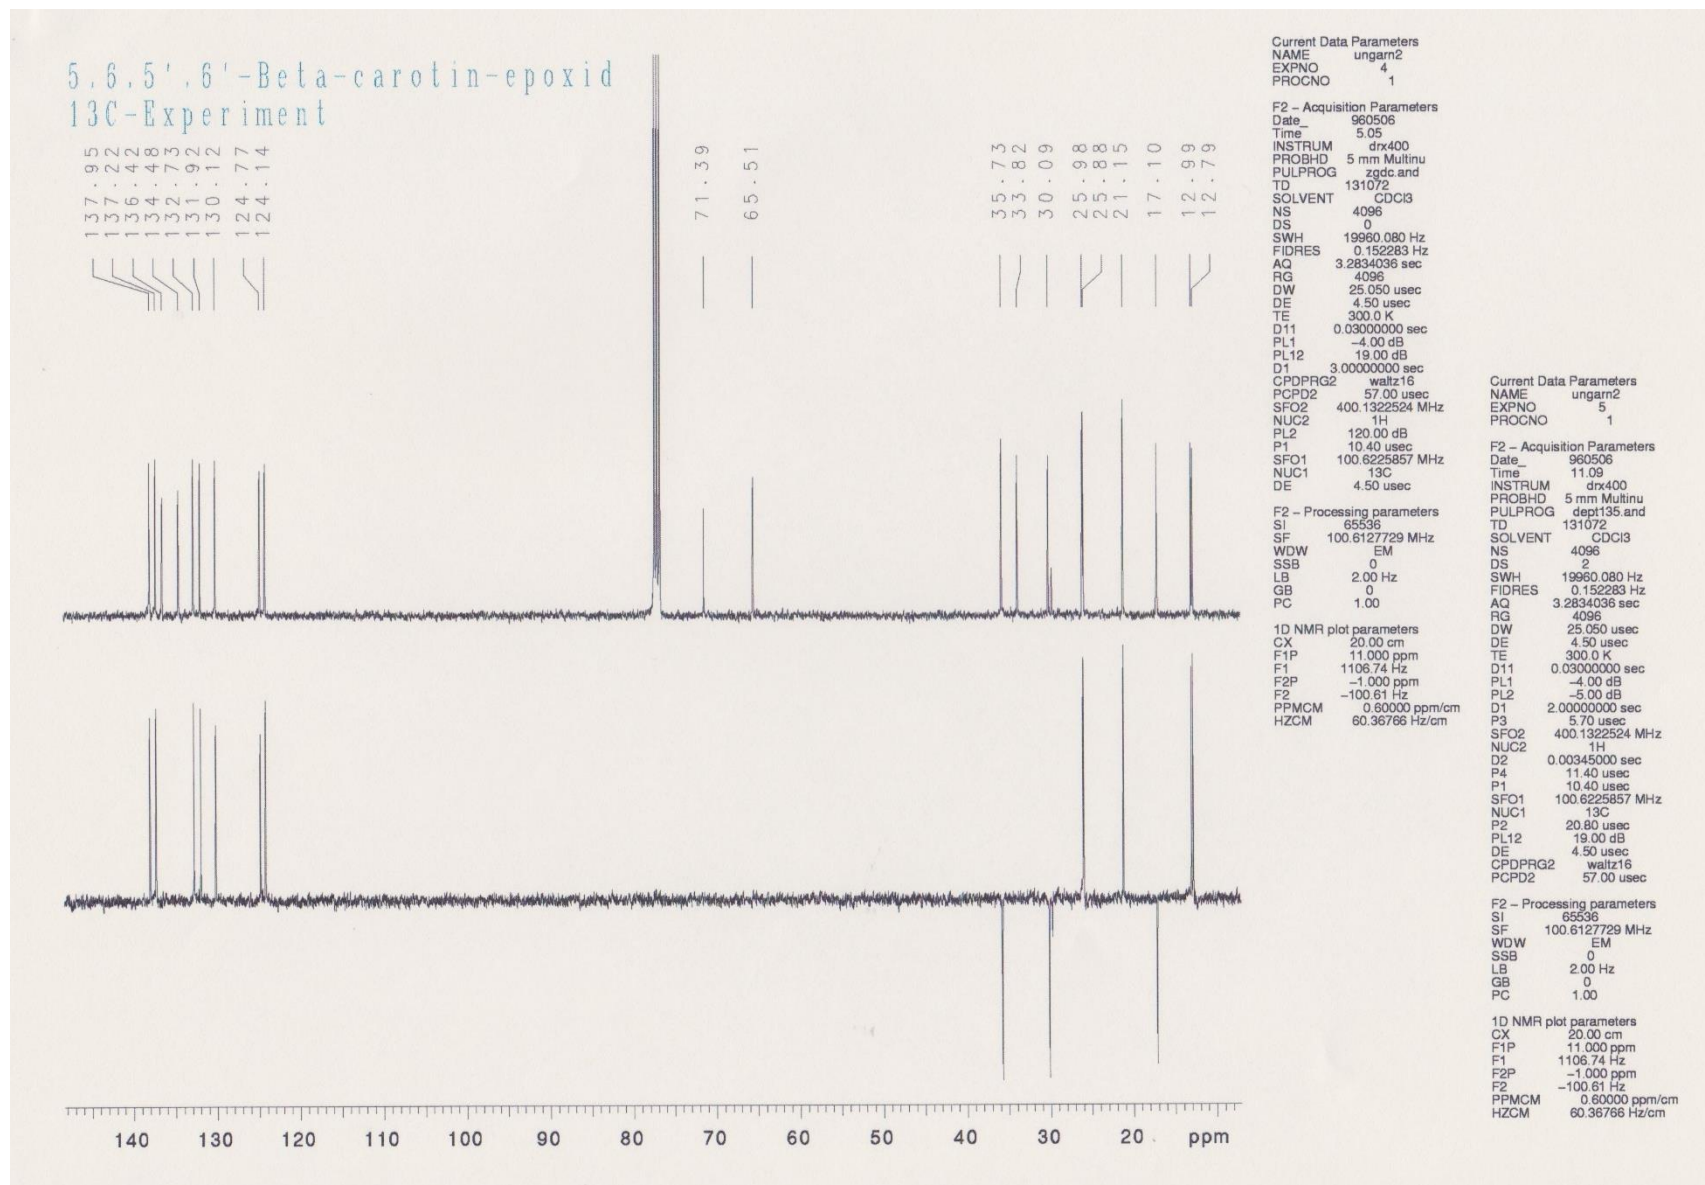

**Figure S9.a.**  $^1\text{H}$ ,  $^{13}\text{C}$ -HMQC NMR spectrum of  $\beta$ -carotene 5,6,5',6'-diepoxide (**11**) in  $\text{CDCl}_3$

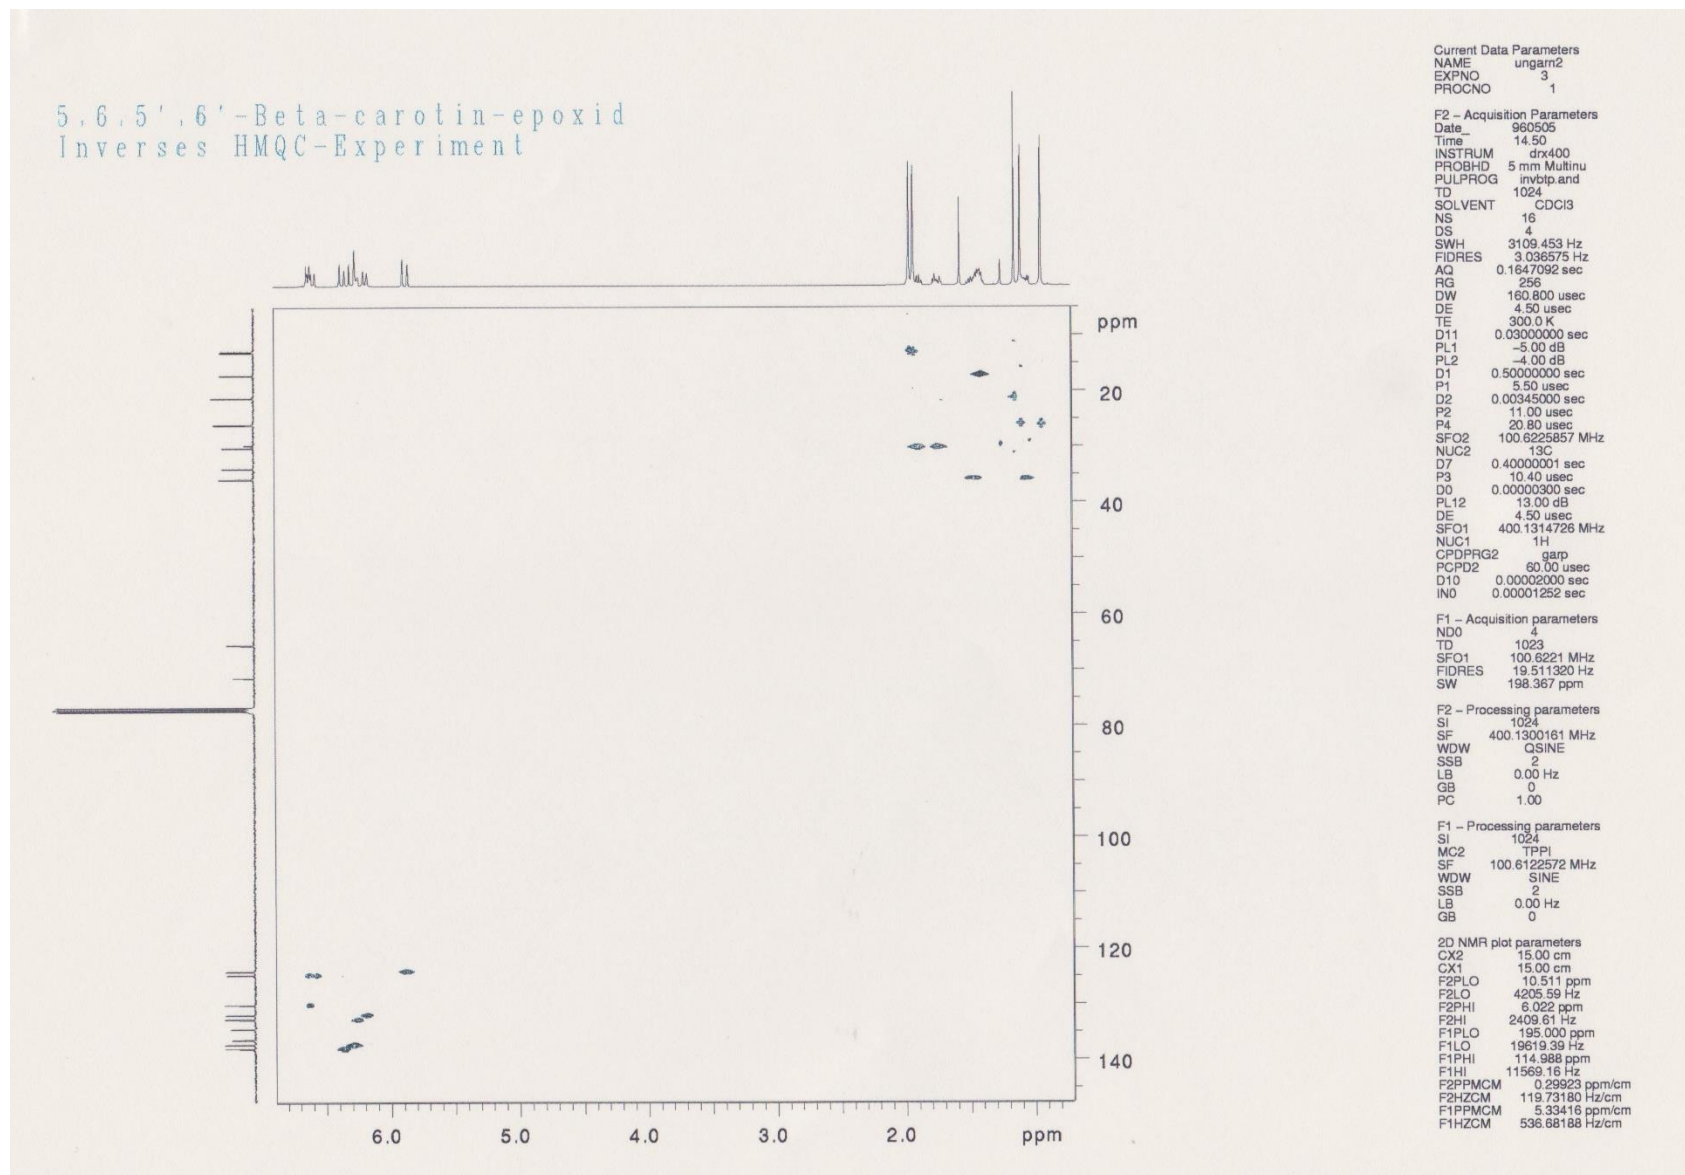

**Figure S9.b.**  $^1\text{H}$ ,  $^{13}\text{C}$ -HMQC NMR spectrum of  $\beta$ -carotene 5,6,5',6'-diepoxide (**11**) in  $\text{CDCl}_3$

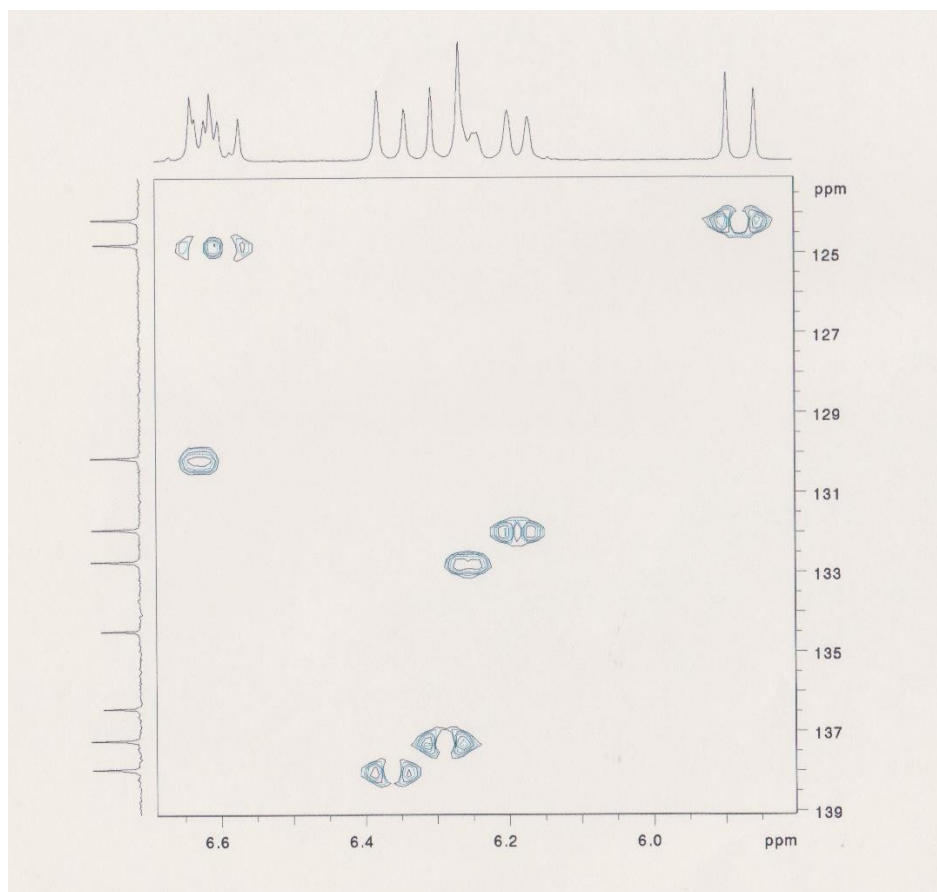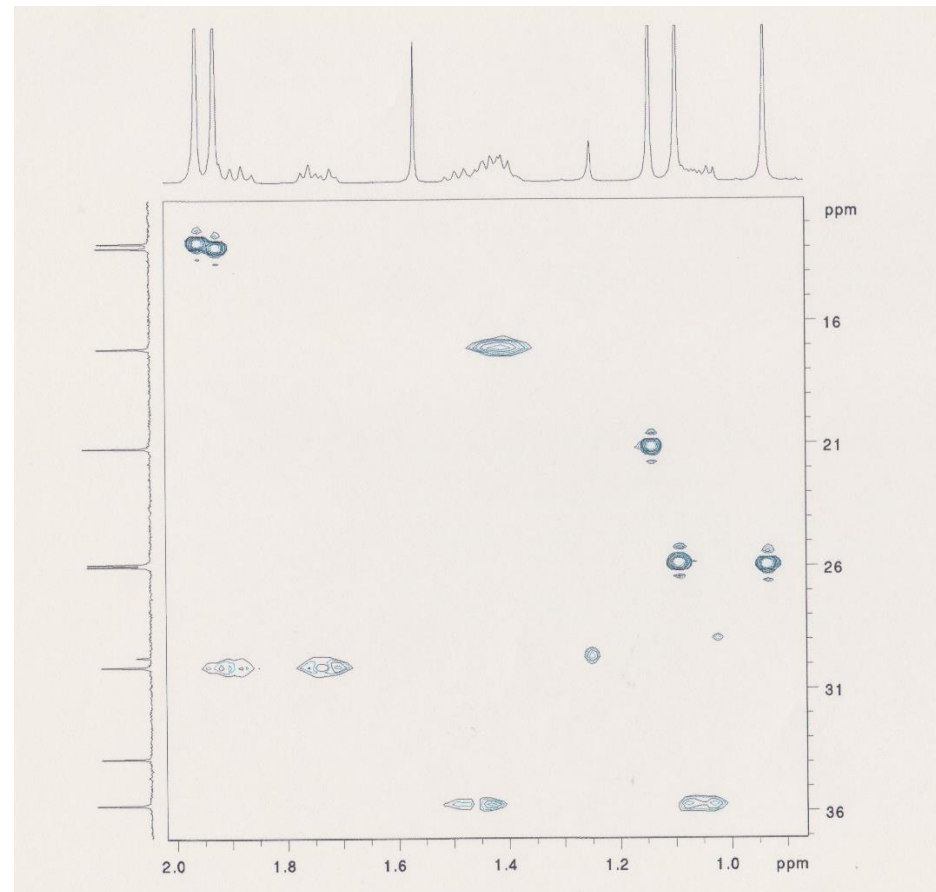

**Figure S10.** UV-vis and EIC chromatogram of *Teleki speciosa* flower extract.

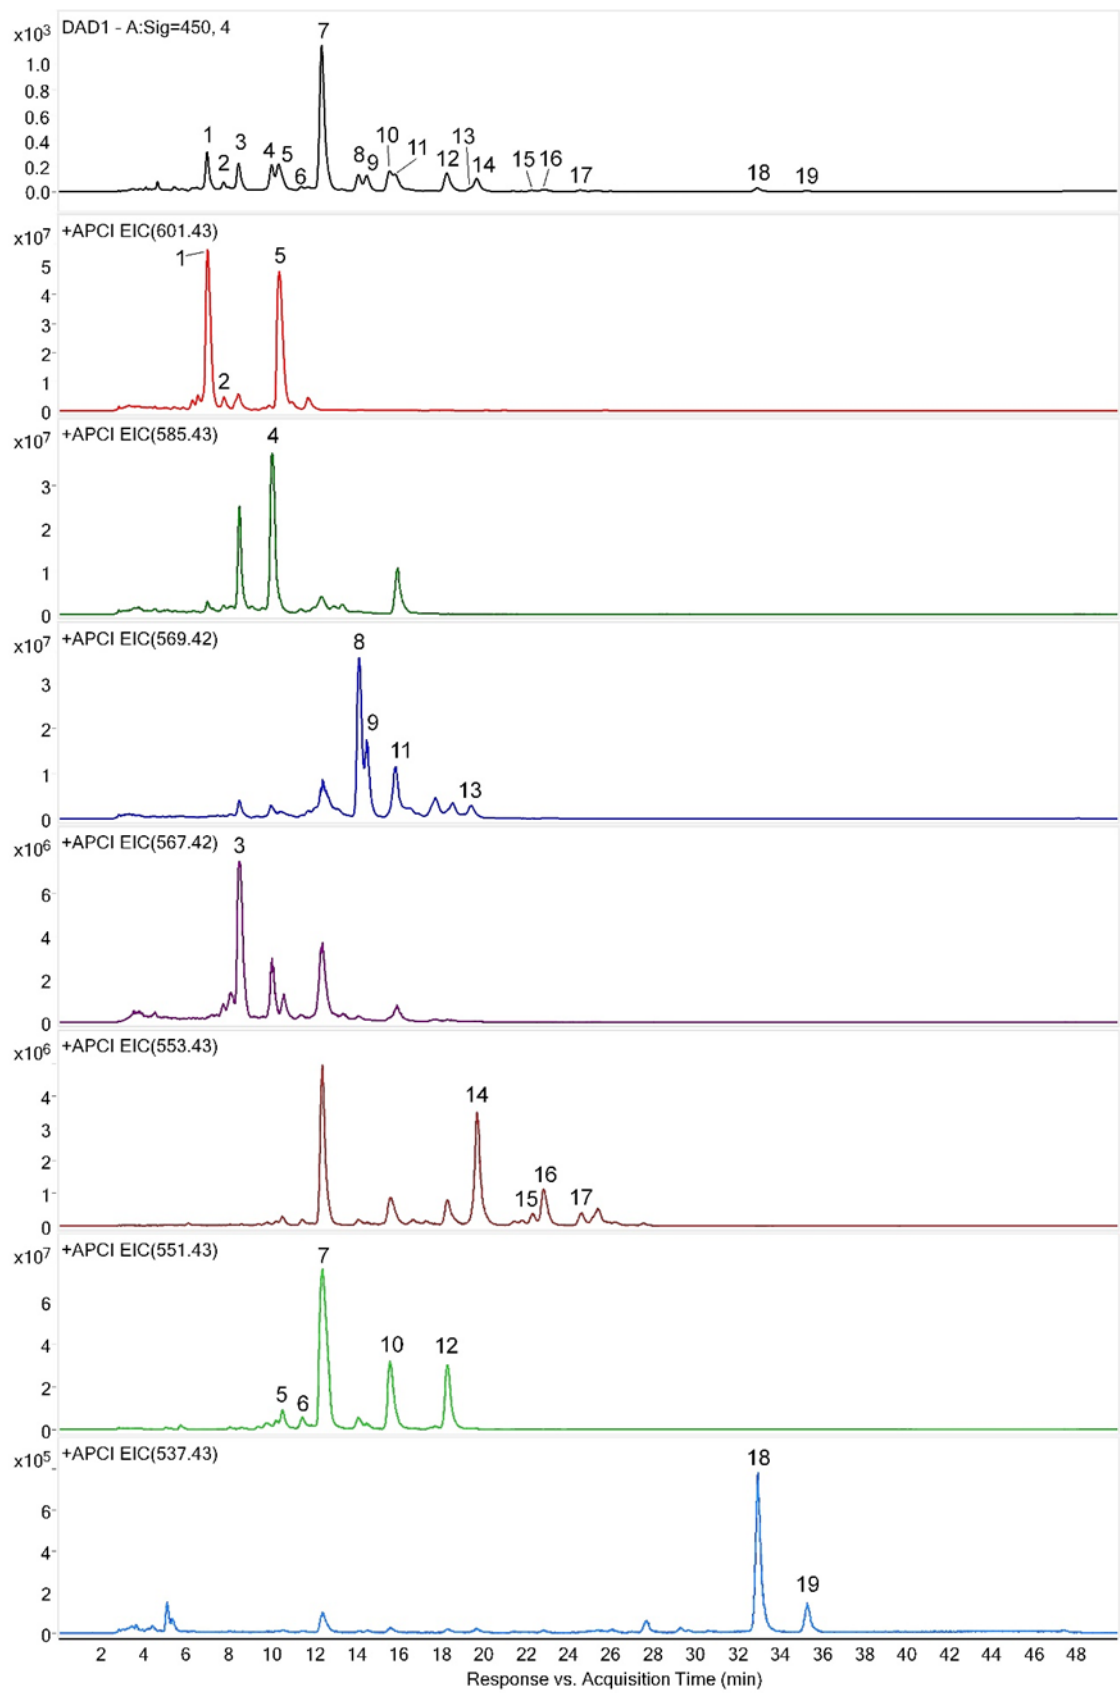

**Figure S11.** UV-vis spectra of catotenoids in *Telekia speciosa* flower extract detected by HPLC-DAD

Peak 1: Violaxanthin

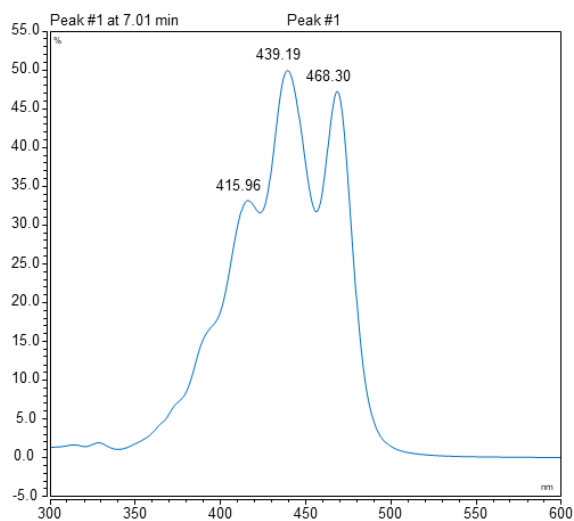

Peak 2: (9Z)-Neoxanthin

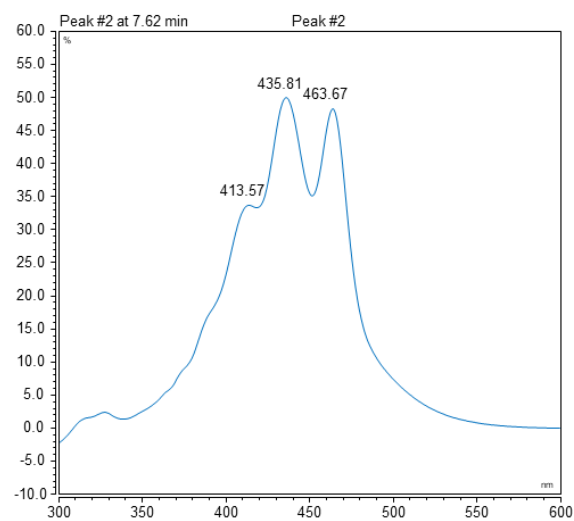

Peak 3: Lutein 5,6-epoxide

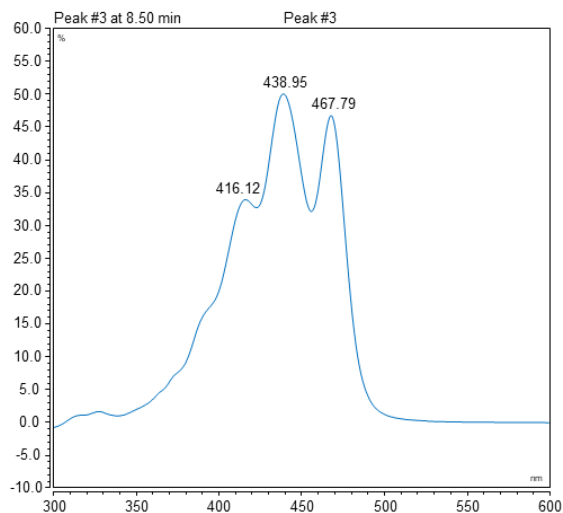

Peak 4: Antheraxanthin

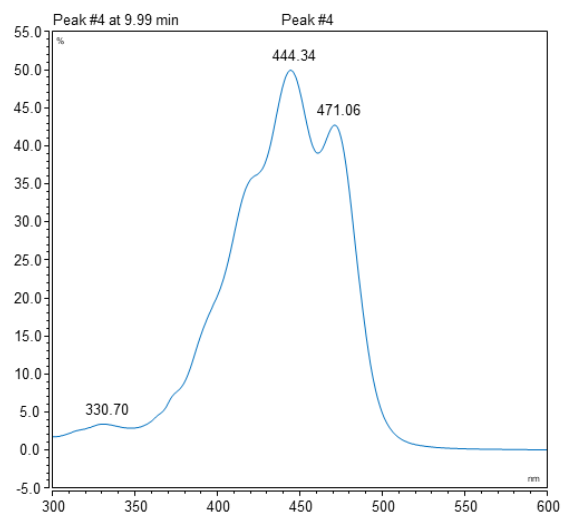

Peak 5: (9Z)-Violaxanthin

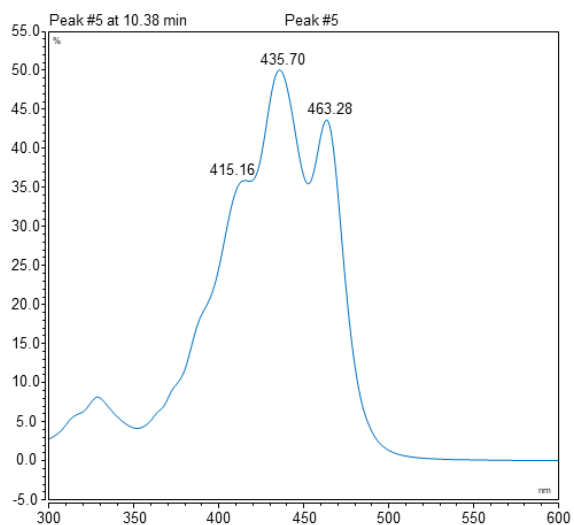

Peak 6: (13'Z)-Lutein

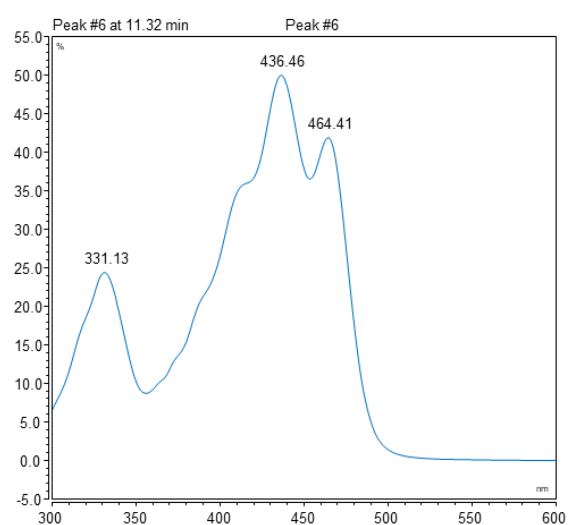

Peak 7: Lutein

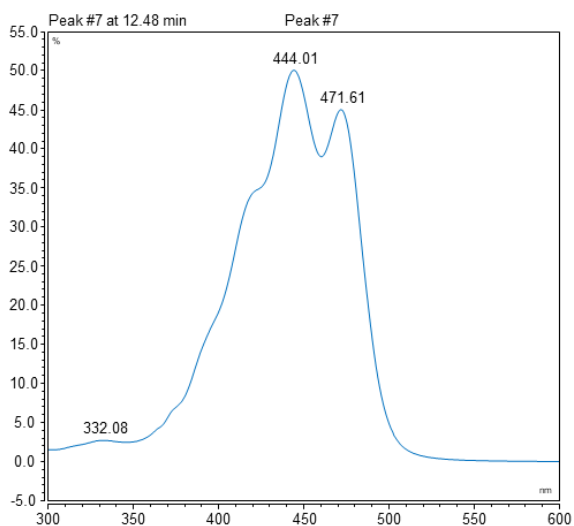

Peak 8:  $\beta$ -Carotene diepoxide

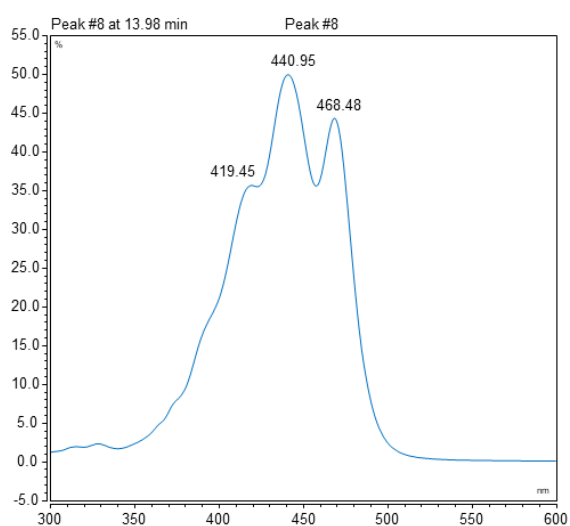

Peak 9: Zeaxanthin

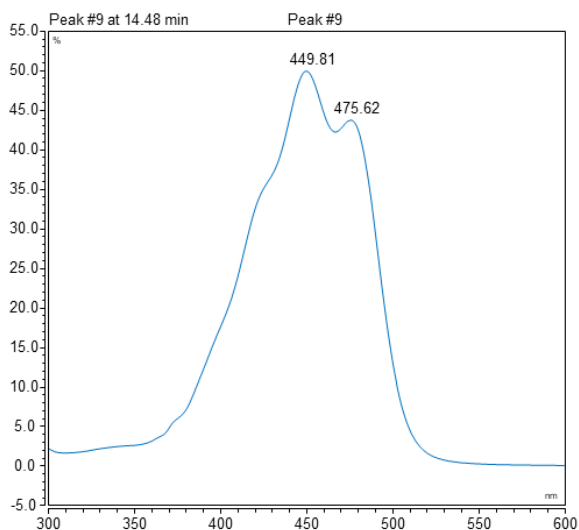

Peak 10: (9Z)-Lutein

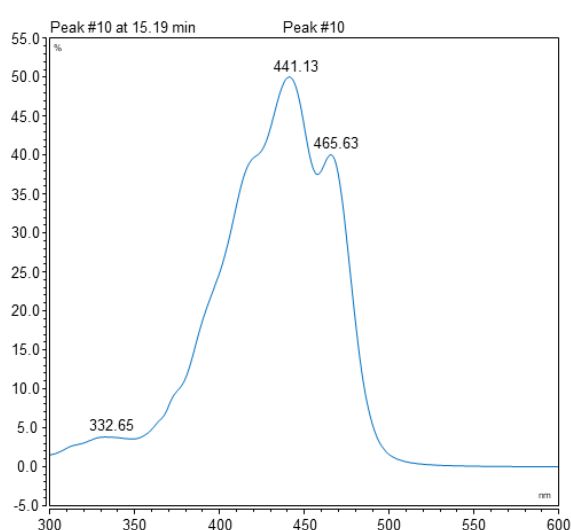

Peak 11: Aurochrome

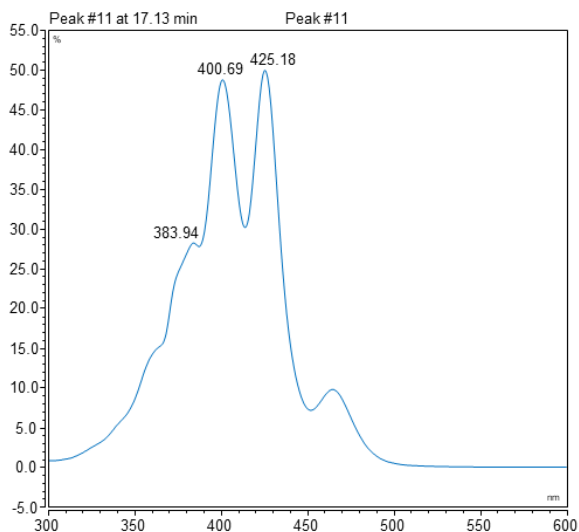

Peak 12: (9'Z)-Lutein

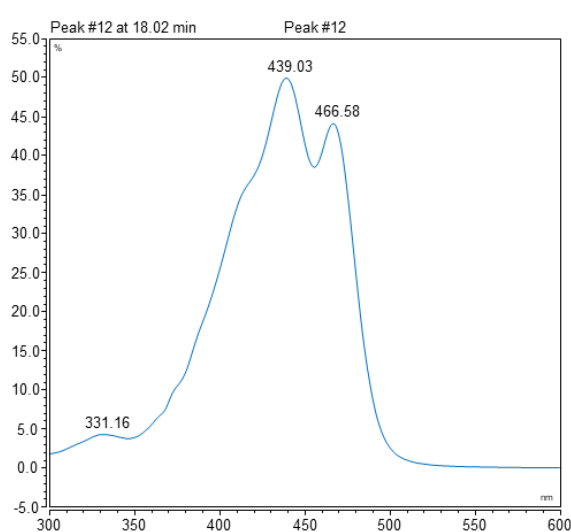



Peak 13: (9Z)-Zeaxanthin

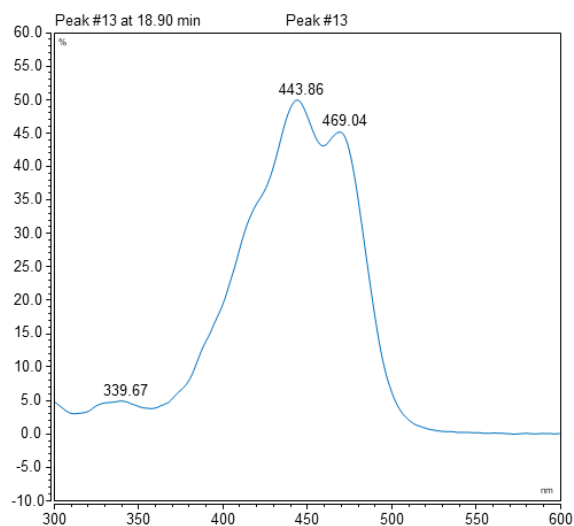

Peak 14:  $\alpha$ -Cryptoxanthin

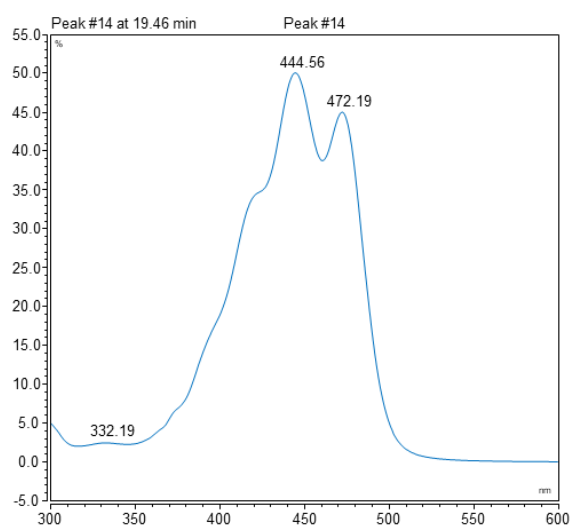

Peak 15: (9Z)- $\alpha$ -Cryptoxanthin

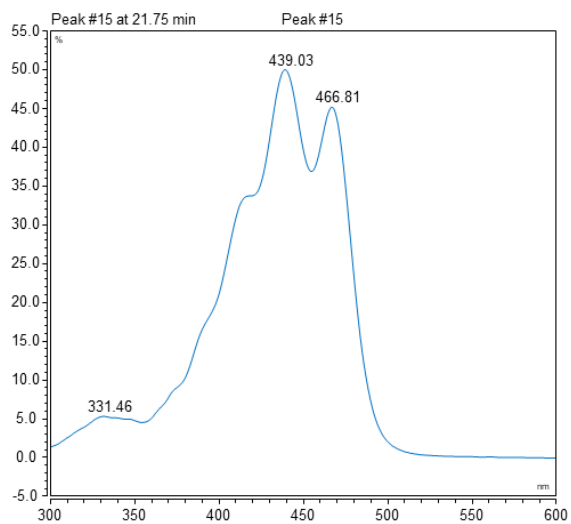

Peak 16:  $\beta$ -Carotene 5,6-epoxide

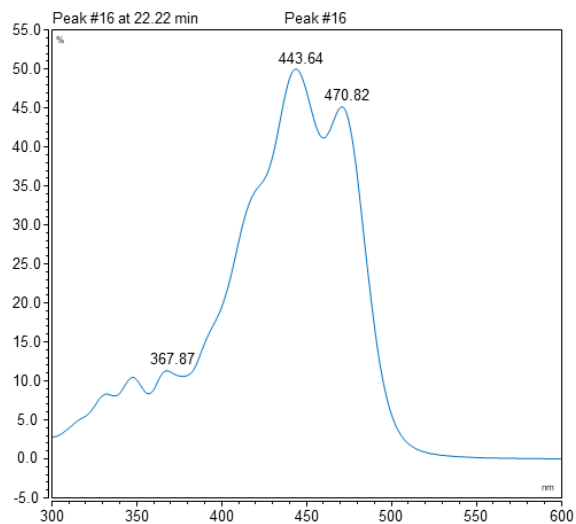

Peak 17:  $\beta$ -Carotene 5,8-epoxide

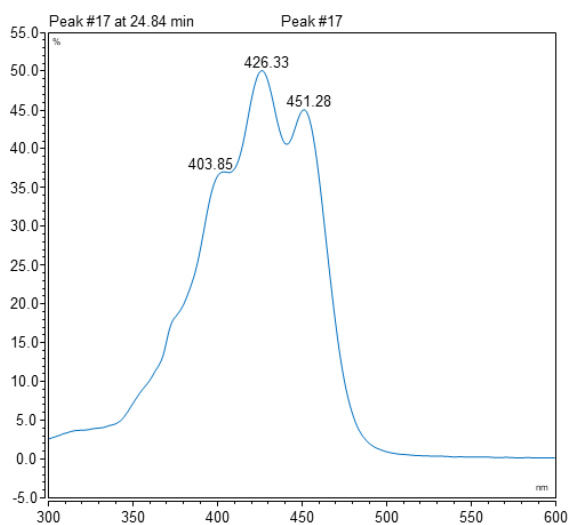

Peak 18:  $\beta$ -Carotene

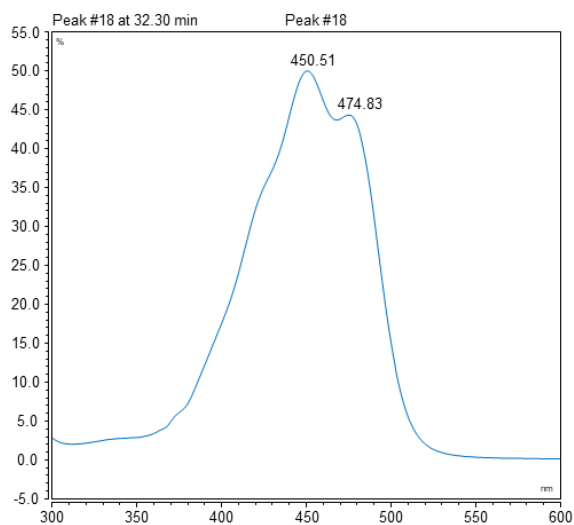

Peak 19: (9Z)-β-Carotene

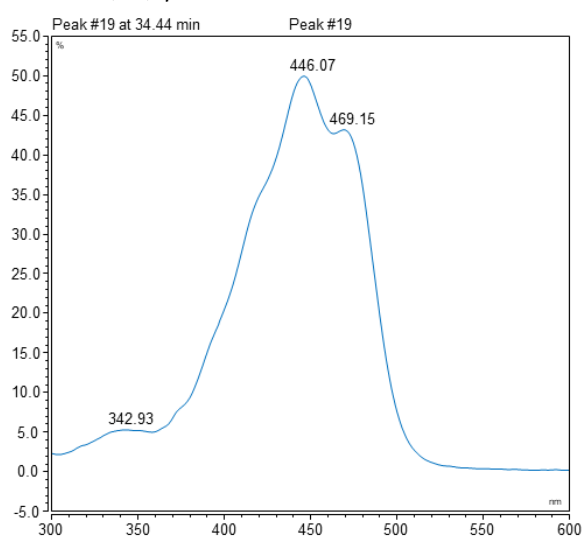

Supplement: s1 [file s1]
